# 1 Nature based measures reverse catchment biodiversity loss and 2 increase freshwater resilience in an agricultural landscape

3  
4 P WILLIAMS<sup>1</sup>, J BIGGS<sup>1</sup>, C STOATE<sup>2</sup>, J SZCZUR<sup>2</sup>, C BROWN<sup>3</sup>, S BONNEY<sup>4</sup>

5  
6 1 Freshwater Habitats Trust, Bury House, North Place, Headington, Oxfordshire OX3 9HY

7 2 The Game & Wildlife Conservation Trust, Allerton Project, Loddington, Leic. LE7 9XE

8 3 Environment Department, University of York, Heslington, York YO10 5NG

9 4 Environment Agency, Nene House, Pytchley Lane, Kettering, Northamptonshire NN15 6JQ

## 10 11 Abstract

12 This study presents some of the first evidence of the effects of nature based agricultural  
13 mitigation measures on freshwater biodiversity at catchment level. We measured alpha (site)  
14 and gamma (catchment) richness in all waterbody types (streams, ponds, ditches) present in  
15 three upper-catchments in the English lowlands to investigate whether adding (i) ecosystem  
16 services measures and (ii) biodiversity protection measures would increase freshwater plant  
17 biodiversity. All catchments saw a background decline in macrophytes during the nine-year  
18 survey period, with a mean species loss of 1% pa, and a rare species loss of 2% pa. Ponds  
19 were a lynchpin habitat with a disproportionate influence on catchment trends. Five years  
20 after introducing nature based measures, regression analysis shows that natural colonisation  
21 of ecosystem services waterbodies (bunded streams and ditches, runoff ponds, flood  
22 storage ponds) largely cancelled-out the background catchment decline in plant richness  
23 but, importantly, did not restore the loss of rare plants. The addition of clean water ponds as  
24 a biodiversity-only measure brought substantial benefits, increasing catchment richness by  
25 26%, and the number of rare plant species by 181%. Populations of spatially restricted  
26 species also increased and other metrics of resilience improved. Adding stream debris-dams  
27 had no effect on plant richness and resilience measures. The findings suggest that  
28 ecosystem services measures could bring some biodiversity benefits to agricultural  
29 catchments. However, the creation of clean-water ponds specifically targeted for biodiversity  
30 may hold considerable potential as a tool to help stem, and even reverse, ongoing declines  
31 in freshwater plant biodiversity across farming landscapes.

32  
33 **Key words:** stream; ditch; clean water pond; constructed wetland; net gain; ecosystem  
34 services

## 35 36 37 1 Introduction

38 Measures to protect the aquatic environment within farming landscapes currently cost many  
39 millions of pounds annually, with expenditure exceeding £470 m per annum in the UK alone  
40 (Rayment, 2017). This spend reflects a widespread recognition that agriculture, which makes  
41 up about 40% of land cover worldwide and 70% in Britain (Foley *et al.* 2005; Brown *et al.*  
42 2006), plays a major role in modifying, and commonly degrading, freshwater ecosystems  
43 and the services that they provide (Moss, 2008; Gordon, *et al.* 2008). In Europe, for  
44 example, member states report that nutrient pollution significantly degrades 28% of all  
45 surface water bodies classified in the Water Framework Directive (Carvalho *et al.*, 2018).

46  
47 The mitigation techniques used to protect freshwaters from agriculture-associated impacts  
48 are wide-ranging. They include pollutant control measures (e.g. riparian fencing, buffer  
49 strips, constructed wetlands, nutrient management plans, minimum tillage), measures to  
50 hold back water in catchments, reduce flow, and increase infiltration (e.g. balancing ponds,  
51 rural Sustainable Urban Drainage Schemes (SUDS), afforestation), and measures to  
52 improve biodiversity and resilience (e.g. debris dams, flow deflectors, river restoration, lake  
53 biomanipulation, pond creation and management), (Cuttle *et al.*, 2016, Zhang *et al.*, 2017).

54

55 Despite the cost and effort involved in implementing agricultural water protection measures,  
56 meta-analyses suggest they are variable in their effectiveness and improvements are often  
57 considerably less than anticipated. This is certainly true for freshwater biodiversity where few  
58 studies have proven that measures bring significant biodiversity or resilience gains  
59 (Bernhardt and Palmer, 2011; Louhi et al., 2011, Harris and Heathwaite, 2012; Robertson et  
60 al., 2018). Even where improvements are reported, their relevance is often difficult to gauge.  
61 Impressive, statistically significant improvements in metric scores may, for example, prove to  
62 be of limited value when put in the wider context of statutory quality targets or minimally  
63 impaired reference conditions (Palmer, 2009; Rhodes et al., 2007; Thomas, 2018).

64

65 Our limited understanding of the benefits of agricultural measures on freshwater biodiversity  
66 is compounded by an almost universal tendency to evaluate measure success based on a  
67 very partial element of the catchment: mainly rivers and streams, and in some cases lakes.  
68 We now know that small waterbodies including ponds, springs, headwaters and ditches,  
69 typically support a high proportion of the freshwater biodiversity within agricultural  
70 catchments (Williams et al., 2004; Céréghino, 2007, Davies et al., 2008, Bubíková and  
71 Hrivnák, 2018). Ignoring these habitats when assessing the benefits of mitigation measures  
72 can lead to a perception bias. The considerable overlap between the biota of standing and  
73 running waters (Biggs et al., 2017) means that species gains reported in river networks can  
74 be trivial if these taxa are already widely present in other catchment waterbodies. Whilst  
75 reliance on data from a subset of catchment waterbodies may miss broader trends that  
76 profoundly affect freshwater biodiversity.

77

78 In this paper we look at the effect of a introducing a range of nature based water protection  
79 measures to higher plant biodiversity and resilience measures within a typical agricultural  
80 area of the English Midlands. The work forms part of the Water Friendly Farming initiative: a  
81 long-term research and demonstration project to investigate the effectiveness of landscape-  
82 wide mitigation measures intended to reduce the impact of rural land use on water, whilst  
83 maintaining profitable farming (Biggs et al., 2014).

84

85 The study is based on a Before-After-Control-Impact (BACI) design with a three-year  
86 baseline and, to date, five years of post-intervention monitoring. The nature based measures  
87 we applied included resource protection features intended to slow flows, intercept polluted  
88 water and sediment and store flood water (e.g. bunded ditches, interception ponds, flood  
89 storage ponds). We also added two simple habitat creation measures specifically intended to  
90 bring biodiversity benefits: clean water ponds and stream debris dams. Clean water ponds  
91 are off-line waterbodies (not connected to streams or ditches) located in parts of the  
92 landscape where, as far as possible, they fill with unpolluted surface-water or groundwater.  
93 Recent evidence suggests that these waterbodies can rapidly become species-rich and  
94 retain their value for many years (Williams et al., 2008, 2010; Oertli, 2018). Debris dams are  
95 widely applied in river restoration as features intended to increase habitat (and therefore by  
96 implication, biotic) diversity (Roni et al., 2014).

97

98 To assess the impacts these mitigation features had at landscape scale, we undertook site  
99 and whole-catchment census studies in all the freshwaters present in the study area,  
100 specifically: streams, ponds and ditches. The landscapes have no waterbodies large enough  
101 to be described as rivers or lakes (Brown et al., 2006). We chose to use wetland plant  
102 attributes as measures of biodiversity and resilience because: (i) census data can be  
103 collected relatively rapidly, (ii) temporal and spatial trends in wetland plants have been  
104 shown to correlate positively with trends in other biotic groups, particularly aquatic  
105 macroinvertebrates, making them broadly representative (Williams et al., 2004; Vad et al.,  
106 2017; Zelnik et al., 2018).

107

## 108 **2 Study area**

109 The Water Friendly Farming study area lies within three adjacent sub-catchments of the  
110 River Welland and the River Soar in Leicestershire, England. Topographically, this is a  
111 region of low rolling hills (95-221 m OD) with mixed farming (Table 1). The cultivated land  
112 falls into two of the most extensive of Britain's agricultural land classes: Defra Land Class 4  
113 eutrophic tills, and Land Class 6, pre-quaternaly clay, which together make up 35% of the  
114 cultivated land in Great Britain (Brown et al., 2006). Agriculture in the study area is divided  
115 between arable land mainly under oilseed rape and winter wheat with additional field beans  
116 or oats, and grassland used to pasture beef cattle and sheep or cut for hay or silage.  
117

## 118 **3 Experimental set-up**

119 The study is based on a Before-After-Control-Impact (BACI) design with two experimental  
120 catchments centred on the Eye (52° 37' 34.4"N 00° 53' 12.4"W ) and the Stonton  
121 (52° 36' 08.0"N 00° 54' 32.8"W), and one control catchment: the Barkby (52° 38' 48.9"N  
122 00° 54' 28.0"W). Each catchment is around 10 km<sup>2</sup> in area (respectively: 10.6, 9.4, 9.6 km<sup>2</sup>).  
123 Survey waterbodies were identified using a combination of Ordnance Survey 1:1 250 scale  
124 maps, landowner information and field-walks. Three waterbody types were recognised using  
125 the definitions given in Williams et al. (2004): streams, ditches and ponds.  
126

127 Nature based mitigation measures were introduced in 2013 and the early months of 2014,  
128 with the exception of debris dams (most introduced in 2015). Two types of measures were  
129 added (Table 1):

130 (i) Ecosystem services measures introduced to both the Eye and Stonton catchments. These  
131 were designed to have a multifunctional role including pollution reduction, flood peak  
132 attenuation, groundwater recharge and biodiversity protection. They included (a) earth-  
133 banded streams and ditches mainly used to hold-back water and trap sediment and (b) two  
134 types of interception ponds: run-off ponds that intercept arable field drains and flood-storage  
135 ponds filled by streams or ditches during periods of high water flow.

136 (ii) biodiversity-focussed measures, which were added to only one of the experimental  
137 catchments (Stonton). Two measures were added: clean water ponds and stream debris  
138 dams, both specifically designed to increase catchment species richness and resilience.  
139

140 All measures were left to colonise naturally, with no wetland plants added to the waterbodies  
141 or their banks.  
142

143 The third catchment (Barkby) remained as a control. No mitigation measures were installed  
144 here although, as in the Eye and Stonton, this catchment had a normal level of agri-  
145 environment scheme protection (e.g. cross compliance buffer strips, Defra 2018).  
146

## 147 **4 Methods**

### 148 **4.1 Sampling strategy**

149 All catchments were monitored for three years prior to the addition of nature based  
150 protection measures (2010-2012). Ecological surveys were not undertaken during 2013  
151 whilst measures were put in place. Post-mitigation monitoring was undertaken annually  
152 during the five-year period from 2014 to 2018.  
153

154 Wetland plant (i.e. aquatic macrophyte) data were collected annually from waterbodies in  
155 August. Plant species and their percentage abundance were recorded while walking and  
156 wading the margins and shallow water areas of the waterbody. For sites with deeper water,  
157 submerged aquatic plants were surveyed using a grapnel thrown from the bank. 'Wetland  
158 plants' were defined as the plants listed in Freshwater Habitats Trust (2015) Wetland Plants

159 Recording Form, which comprises a standard list of ca. 300 water-associated higher plants  
160 divided into three categories: submerged, floating-leaved and emergent plants.

161  
162 Site (alpha) richness data were collected from randomly selected locations that were  
163 revisited each year (termed here 'standard samples'). Site selection was stratified by  
164 catchment and waterbody type. Twenty standard sample sites were surveyed from each  
165 waterbody type in each catchment. This gave a total of 360 sample sites per year prior to the  
166 introduction of measures, and around 420 thereafter. River and ditch sections were selected  
167 by dividing the network into 100 m lengths and randomly selecting 20 lengths for survey. To  
168 ensure that ecological data gathered from different waterbody types could be directly  
169 compared, the sampling was area-limited with data from each site collected from a 75 m<sup>2</sup>  
170 area of the waterbody based on the method described in Williams et al. (2004). Although this  
171 area-based method enabled waterbodies with widely differing dimensions and  
172 characteristics to be compared, small waterbodies less than 75 m<sup>2</sup> are by definition,  
173 excluded from the survey. To avoid completely omitting smaller habitats, where appropriate,  
174 closely adjacent pools were aggregated to give a 75 m<sup>2</sup> total area. This included tree-fall  
175 pools in a wooded fen, and small ecosystem services bunded-ditch pools in a series of two  
176 or three features. Debris dams were assessed by surveying a 75m<sup>2</sup> area of stream centred  
177 on the dam.

178  
179 Gamma richness data were collected from a census survey of all ponds and ditches in each  
180 year. Streams were an extensive habitat type that could not be fully surveyed annually. Our  
181 original aim was to use rarefaction curves (Colwell et al. 2012), to calculate gamma richness  
182 from a dataset combining standard samples and an additional 10 randomly selected stream  
183 samples. In practice the rarefaction curves gave variable and intuitively unlikely results. To  
184 investigate this, all streams were fully surveyed in 2018. Comparison of our stream census  
185 data and rarefaction-predicted results showed that rarefaction curves over estimated true  
186 gamma richness in 2018 by 17%-68% depending on the algorithm used and catchment  
187 modelled. Simple summing of the standard and random alpha richness data gave a result  
188 that was a close match to the true gamma of our relatively homogeneous streams: varying  
189 between zero and one species per catchment below true gamma. In the following analysis  
190 we have therefore used the summed stream alpha survey data to represent true gamma for  
191 all years.

192

## 193 **4.2 Analytical methods**

194 Wetland plant biodiversity was assessed on the basis of species richness and species rarity.  
195 Alpha richness was measured as the number of species, or distinctive taxa, recorded. Alpha  
196 rarity was the number of regionally or nationally rare plant species recorded in any of the  
197 categories listed in Table 2. Gamma richness and rarity were the total number of species  
198 and rare species recorded respectively in each waterbody type or catchment area.

199

200 Resilience was assessed biologically in terms of alpha and gamma richness and rarity  
201 metrics (as above), and in terms of population attributes (Timpane-Padgham et al., 2017),  
202 specifically: (i) the number of species with restricted distribution in our catchments,  
203 measured as species recorded from only one or two sites, termed 'uniques' and 'doubles'  
204 respectively (c.f. Gotelli and Colwell, 2011), (ii) the number of restricted species with small  
205 populations, measured as species with a total aerial coverage of <5m<sup>2</sup>. Physical metrics of  
206 resilience were: (i) total water body area, measured from 1:500 scale map data and ground-  
207 truthed in the field, (ii) the proximity of standing waters, measured as a nearest neighbour  
208 analysis on ArcGIS Pro 2.3.

209

210 Statistical differences between the species richness of waterbody types and catchments  
211 were tested using two and three way between-subjects ANOVAs, using square-root  
212 transformed data. Non-parametric tests (2-tailed Mann-Whitney U and Friedman tests) were

213 used to analyse plant rarity data where there were a high proportion of zeros. Simple linear  
214 regression was used to investigate changes in richness and rarity over time. Analyses were  
215 run on IBM SPSS Statistics version 2015.

216

## 217 **5 Results**

### 218 **5.1 Baseline wetland plant results for the three catchments**

219 Underlying trends in alpha (site) and gamma (catchment) plant richness and rarity were  
220 calculated using data from each annual survey. These data sets excluded new ponds and  
221 other waterbodies created or modified after 2013 as part of project measures. The results  
222 therefore indicate the background biodiversity trends in the absence of the direct effect of the  
223 project's physical habitat creation work.

224

#### 225 **5.1.1 Background alpha richness and rarity trends**

226 Figure 1 illustrates the underlying trends in alpha richness for each waterbody type in each  
227 catchment. A factorial ANOVA to look at the relationship between waterbody type, richness  
228 and year showed that the main effect for waterbody type gave an F ratio of  $F(2,1368) =$   
229  $165.653$ ,  $p < 0.001$ , indicating significant differences in plant richness between the waterbody  
230 types. Pairwise comparisons showed a significant differences at  $p < 0.001$  in all cases, with  
231 ponds considerably richer in wetland plant species than other waterbody types (Mean=8.93  
232 species, SE =0.20), followed in turn by streams (M=5.58, SE=0.18) and then ditches  
233 (M=4.28 SE=0.13). Ponds were also the only habitat type that consistently supported  
234 submerged and floating-leaved plant species.

235

236 The main effect for catchment type yielded an F ratio of  $F(2,1368) = 20.960$ ,  $p < .001$ ,  
237 indicating significant differences in plant richness between the three catchments. Pairwise  
238 comparisons showed that Barkby catchment was significantly richer in wetland plant species  
239 than the other two catchments (both  $p < .001$ ), M=7.19 SE=0.21). The Eye catchment  
240 (M=6.16 SE=0.19) was marginally, but not statistically significantly, richer than the Stonton  
241 catchment (M=5.44 SE=0.18),  $p = .070$ ). There was a significant interaction effect between  
242 catchment and waterbody type, ( $F(4,1368) = 3.467$ ,  $p < .01$ ).

243

244 Visual inspection of temporal trends through the survey period (Figure 1) suggests a  
245 tendency for mean alpha richness to decline between 2010 and 2018 in most waterbody  
246 types and catchments. However, this trend was not provable statistically with no significant  
247 main effect for year or for the three-way interaction and between-subject effects for year,  
248 waterbody type and catchment.

249

250 Rare plant species recorded from the standard survey sites were largely restricted to ponds,  
251 which supported a mean of 0.44 rare species per site. The occurrence of rare plants in  
252 streams and ditches was an order of magnitude lower (both 0.03 rare species per site). The  
253 high proportion of zero values in the dataset precludes tests of statistical significance. The  
254 number of rare plant species did not differ significantly between any of the three catchments  
255 (Mann-Whitney U test). There was no evidence of temporal trends in the rare species data  
256 for any catchment (Friedman test of differences among repeated measures).

257

#### 258 **5.1.2 Gamma richness and rarity trends**

259 The underlying gamma richness trends for all waterbody types and catchments in the  
260 absence of measures are shown in Figure 2. In total 106 wetland plant species were  
261 recorded from census surveys of the three catchments during this time, with a mean of 92.8  
262 species (range 89-99) in any one year. The Barkby control catchment supported the greatest  
263 number of species per year (78.9 species, 85% of total gamma for all three catchments),  
264 followed by the Stonton (61.3 species, 66% of total gamma) and Eye (54.0 species, 59% of  
265 total gamma).

266  
267  
268  
269  
270  
271  
272  
273  
274  
275  
276  
277  
278  
279  
280  
281  
282  
283  
284  
285  
286  
287  
288  
289  
290  
291  
292  
293  
294  
295  
296  
297  
298  
299  
300  
301  
302  
303  
304  
305  
306  
307  
308  
309  
310  
311  
312  
313  
314  
315  
316  
317  
318  
319  
320

Gamma richness differences between the waterbody-types broadly concurred with the alpha richness data. Ponds were much the richest waterbody type in all three catchments in all years, supporting an average of 85.5 species per year. Streams and ditches each supported around half this (43.5 and 38.9 species, respectively).

Temporal trends in gamma richness provide evidence of species loss over the nine-year survey period (Figure 2). In the absence of measures, a simple linear regression showed that gamma richness across all waterbody types and catchments combined declined by 10% during the survey period: ( $F(1,6)=13.785$ ,  $p<.01$ ) with an adjusted  $R^2$  of .646. This represents a loss of 1.1 wetland plant species per annum across the combined area of the three catchments.

Within individual waterbody types, both streams and ditches saw significant declines in richness through the survey period. The regression equation for streams indicates a decline of 1.2 species per annum ( $F(1,6)= 43.774$ ,  $p<.001$ ) with an adjusted  $R^2$  of .859. The rate of loss in ditches was 0.7 species per annum ( $F(1,6)= 9.755$ ,  $p<.05$ ) with an adjusted  $R^2$  of .556. Pond richness also showed a tendency towards decline, however declines in the Barkby and Eye catchment ponds were counter-balanced by increased richness in the Stonton Ponds (see below), and the combined regression equation was not statistically significant ( $F(1,6)= 1.545$ ,  $p=.26$ ) with an adjusted  $R^2$  of .072.

Of the three catchments, the Barkby catchment, which was initially the most species-rich, saw the greatest decline in plant species (14.0%), ( $F(1,6)= 29.742$ ,  $p<.01$ ) with an adjusted  $R^2$  of .804 representing a loss of 1.4 species per year. The Eye catchment declined by 10% ( $F(1,6)= 7.987$ ,  $p<.05$ ) with an adjusted  $R^2$  of .500, 0.6 species per year. Declines in the Stonton catchment were smaller (2%) and not statistically significant ( $F(1,6)= 0.340$ ,  $p=.581$ ) with an adjusted  $R^2$  of -.104.

Amongst individual waterbody types and catchments, there was just one incidence where species richness tended to increased rather than decrease during the survey. This was pond gamma richness in the Stonton catchment where simple regression indicates an increase of 5% over the nine-year period (0.3 species pa). This increase is too small to be significant ( $F(1,6)= 1.366$ ,  $p=.287$ ) with an adjusted  $R^2$  of .050. However, the Stonton ponds remain anomalous as the only catchment waterbody type that showed a net gain in species between the first and last year of the survey. Examination of the data suggests that at least part of this increase was due to an unexpected indirect effect of the project's habitat creation after 2014: with new-to-the-catchment species, like the submerged aquatic *Potamogeton pusillus* and marginal plant *Equisetum palustre*, that rapidly colonised the new clean-water ponds, subsequently moving out to colonise adjacent pre-existing ponds.

In total, 18 plant species that were either nationally or regionally rare were recorded from the baseline waterbodies in the three catchments across all years; 16% of the total flora. Ponds supported by far the greatest proportion of these rare species (89% across all catchments and survey years). Streams and ditches each supported 17% of the rare species pool.

All catchments showed a tendency towards a background loss of rare plant species during the survey period (Figure 3). Simple regression of total gamma rarity for all waterbodies and catchments combined gives a decline of 22% (0.4 species pa), ( $F(1,6)= 8.088$ ,  $p<.05$ ) with an adjusted  $R^2$  of .503.

Of the three catchments, declines were greatest in the Barkby where there was a loss of 0.5 rare species per annum (loss of 34% of the Barkby's rare plant species during the sampling period), ( $F(1,6)= 13.224$ ,  $p<.05$ ) with an adjusted  $R^2$  of .636. Rare species loss was also high in the Eye catchment: 0.3 species per annum (38%), ( $F(1,6)= 10.456$ ,  $p<.05$ ) with an

321 adjusted  $R^2$  of .575. The Stonton catchment showed a small net decline in rare species, but  
322 the regression relationship is not significant ( $F(1,6)= 0.576$ ,  $p=.476$ ) with an adjusted  $R^2$  of -  
323 .064. In all catchments, loss of rare plant species was predominantly (63%-75%) due to the  
324 loss of submerged aquatic plant species from the catchments' ponds.

325

### 326 **5.1.3 Unique and restricted species**

327 Combining data from all catchments and all years shows that close to half (48%) of the plant  
328 species recorded from baseline waterbodies were found in only one of the three waterbody  
329 types. Of these species, 83% were restricted to ponds, 13% to streams and 4% to ditches.  
330 This pattern was more striking for rare species where 89% of the baseline plant species  
331 were restricted to a single waterbody type, and 88% of these were unique to ponds. Two  
332 species were unique to other waterbody types, but both of these were lost early on in the  
333 survey due to adverse management practices.

334

335 Many plant species had a highly localised distribution and small populations. In the final year  
336 of the survey 34% of taxa were found only as uniques or doubles (i.e. recorded from one or  
337 two sites respectively) across the three catchments. Of these localised taxa, 90% were  
338 found in ponds, and 83% only in ponds; 10% were recorded only in streams and 3% only in  
339 ditches. Most uniques and doubles also occurred at low abundance, with 70% occupying a  
340 total area of less than 5m<sup>2</sup> across all catchments. The majority (86%) of these were pond-  
341 only species. Combining these data shows that 23% of all remaining plant species across  
342 the three catchments were both present at very few sites and occurred in low abundance  
343 within those sites. 86% of these highly restricted plant species were unique to ponds.

344

## 345 **5.2 Effect of adding nature based measures**

### 346 **5.2.1 Physical effect of adding measures**

347 Two main types of nature-based measure were introduced to the project area in 2013.  
348 Multifunctional ecosystem services measures (interception ponds, bunded streams and  
349 ditches) were added to both the Eye and Stonton catchments increasing the area of  
350 freshwater habitat by an average of 0.2 ha per catchment (Table 1). Biodiversity-only  
351 measures: (clean water ponds, debris dams), which were introduced to the Stonton  
352 catchment alone, added an extra 0.24 ha to this catchment. Together, the nature based  
353 measures increased the area of standing waters present in the Eye and Stonton by an  
354 average of 33%, and the total area of all freshwater habitats in these catchments by an  
355 average of 9%. Nearest neighbour analysis for standing waters showed that, in the Eye  
356 catchment, the effect of adding ecosystem services measures was to reduce the between-  
357 waterbody distance of standing waters by 29% from an average of 336 m to 240 m. In the  
358 Stonton, where clean water ponds were also added, there was a 64% reduction from 255 m  
359 to 92 m between waterbodies.

360

### 361 **5.2.2 Alpha richness and rarity of measures waterbodies**

362 In the final survey year, five years after their creation, the mean alpha richness of the new  
363 clean water ponds was significantly greater than other nature based waterbody types created  
364 ( $p < .001$  for all analyses, Figure 4a). Plant richness associated with debris dams was  
365 universally low, and significantly less than for other measures (Table 3). Amongst the  
366 ecosystem services measures, interception ponds were significantly richer than bunded  
367 ditches and streams ( $p < .01$ ).

368

369 The alpha richness of the new clean water ponds was also significantly greater than the  
370 richness of all pre-existing waterbody types in the two experimental catchments (Table 3).  
371 The richness of interception ponds was similar to pre-existing ponds. Bunded ditches and  
372 streams had a similar mean richness to pre-existing streams, and were marginally richer  
373 than pre-existing ditches ( $p=.049$ ), (Figure 4).

374

375 Stream richness adjacent to debris dams was significantly lower than was typical of pre-  
376 existing streams ( $p < .05$ ), and was more similar to the richness of ditches. It is likely that this  
377 is because debris dams were typically added to smaller streams, most of which were also  
378 heavily shaded. This is supported by comparison between debris dams sections and the  
379 nearest unaffected stream lengths which shows that their average richness was almost  
380 identical (debris dams 2.6 species; adjacent streams 2.7 species).

381

382 Of the four main types of nature based measures, only clean water ponds and interception  
383 ponds supported rare species. At five years old, the mean alpha rarity of clean water ponds  
384 exceeded that of other nature based and pre-existing waterbody types and was around  
385 double that of pre-existing ponds (Figure 4c). The high proportion of zeros values in the data  
386 set precludes tests of statistical significance.

387

### 388 **5.2.3 Gamma richness and rarity of measures waterbodies**

389 Amongst the introduced measures, clean water ponds supported the greatest gamma  
390 richness, followed by interception ponds, banded watercourses and debris dams (Figure 4b).  
391 However, the gamma richness of both pre-existing ponds and streams exceeded the total  
392 richness of any of the measures. Gamma rarity showed a different trend (Figure 4d) with the  
393 new clean water ponds supporting the greatest number of rare species, followed by the pre-  
394 existing ponds. Interception ponds supported few rare species, and they were absent from  
395 banded watercourses and debris dams.

396

### 397 **5.2.4 Catchment scale effects from introducing measures**

398 The addition of nature based measures had notable catchment-scale effects in both the Eye  
399 and Stonton catchments (Figures 5, 6).

400

401 In the last year of the study (2018), when the measures were five years old, new-to-the-  
402 catchment plant species in ecosystem services waterbodies increased the total wetland  
403 plant richness of the Eye catchment by 14%, from 50 species in all pre-existing waterbodies,  
404 to 57 species including the ecosystem services measures (Figure 5a). Simple regression  
405 over the survey period, shows that adding ecosystem services measures to the Eye  
406 catchment converted a statistically significant loss of species in pre-existing waterbodies to a  
407 small, non-significant gain ( $F(1,6) = 1.442$ ,  $p = .275$ ) with an adjusted  $R^2$  of .059. In the  
408 Stonton catchment, ecosystem services measures increased species richness by 7%,  
409 (Figure 5b). This changed the small non-significant downward trend in richness in pre-  
410 existing waterbodies to a small non-significant upward trend ( $F(1,6) = 1.883$ ,  $p = .219$ ) with an  
411 adjusted  $R^2$  of .112.

412

413 The clean water ponds contributed more substantially to the Stonton catchment. In 2018, the  
414 five-year old clean water ponds added 13 new wetland plant species; a 22% increase from  
415 60 species in all pre-existing waterbodies, to 73 species with the clean water ponds (Figure  
416 5c). Simple linear regression for the survey period as a whole, shows that this changed the  
417 small non-significant trend towards loss of species in the Stonton catchment to a significant  
418 26% gain ( $F(1,6) = 12.318$ ,  $p < .05$ ) with an adjusted  $R^2$  of .618.

419

420 The total number of species contributed by all nature based measures in the Stonton  
421 catchment was similar to the number added by the clean water ponds alone (Figure 5d).  
422 This was because few plant species were unique to the ecosystem services ponds and  
423 debris dams added no new plant species to the Stonton catchment. The combined effect of  
424 adding all nature based measures was a statistically significant increase of 27% based on  
425 simple linear regression of data for all years ( $F(1,6) = 15.116$ ,  $p < .01$ ) with an adjusted  $R^2$  of  
426 .668.

427



428 Both the ecosystem services and clean water ponds supported rare species that were new  
429 to, or had recently become extinct from, their catchments (Figure 6). However, in the new  
430 ecosystem services waterbodies rare species were transitory colonisers and did not persist  
431 after the features were 1-3 years old (Figures 6a,b). The clean water ponds made a  
432 substantial and lasting contribution to catchment rarity. In 2018, the final year of the survey,  
433 pre-existing waterbodies in the Stonton catchment supported only four rare species. Adding  
434 the clean water ponds tripled this to 12 species. Linear regression for the survey period as a  
435 whole, shows that their addition changed the small non-significant trend towards rare  
436 species loss of species in the Stonton catchment to a significant gain of 181% ( $F(1,6)=$   
437  $35.943$ ,  $p=.001$ ) with an adjusted  $R^2$  of .833 (Figure 6c). New rare species that colonised the  
438 clean water ponds included the Near Threatened *Triglochin palustris*, together with species  
439 such as *Isolepis setacea*, *Juncus subnodulosus* and *Hippuris vulgaris* that are both rare in  
440 the region and increasingly uncommon in lowland England.

#### 441 442 **5.2.5 The effect of adding nature based measures on other resilience attributes**

443 On average, 18.5% of species that had been recorded in the pre-existing Eye and Stonton  
444 waterbodies (2010-2017), were no longer recorded in these catchments in 2018. Of these  
445 'lost' species 15% were present in the Ecosystem Services waterbodies. In the Stonton  
446 catchment where clean water ponds were also created, 31% of 'lost' species were present in  
447 these ponds. No 'lost' species were retained as a result of creating the debris dams.

448  
449 In the final year of the study both types of nature based measures created habitats for  
450 populations of plants that were otherwise highly restricted in their catchments. In total, the  
451 clean water ponds provided 34 new sites for six (22%) of the plant species that were  
452 otherwise present only as uniques or doubles in the Stonton catchment. Ecosystem services  
453 ponds added an average of seven new sites for 3.5 species (12%) otherwise present as  
454 uniques or doubles in the Eye and Stonton catchment.

## 455 456 **6 Discussion**

### 457 **6.1 Trends in catchment aquatic biodiversity**

458 This study is amongst the first to look at catchment-level temporal trends in wetland plant  
459 richness across the full range of waterbody types present in a typical agricultural landscape.  
460 The results showed systematic evidence of decline over the nine-year survey period, with an  
461 annual loss of 1% of plant species, and 2% loss of rare species across the 30 km<sup>2</sup> survey  
462 area as a whole. The limited availability of comparable data makes it difficult to know how  
463 typical these trends are of wetland plant assemblages in other lowland agricultural  
464 catchments. The main exception is Goldyn (2010) who undertook a 30 year re-survey of  
465 plant richness across a range of agricultural waterbodies in West Poland. She found an  
466 increase in gamma richness between 1976 and 2007, although this was mainly due to  
467 colonisation by alien and ruderal species, and the number of rare and threatened plants  
468 declined. Of the available data for specific waterbody types, the most directly comparable  
469 come from the UK Countryside Survey, which looked at trends in headwater stream, ditch  
470 and pond plant assemblages across Britain over recent decades. For ponds at least,  
471 Countryside Survey results broadly parallel our study findings, showing that in the English  
472 lowlands, pond alpha plant richness declined by around 20% (1.8% pa) between 1996 and  
473 2007 (Williams et al 2010). Data from a separate study of ponds in northern England over  
474 the same time period show a similar loss of gamma diversity when based on compatible  
475 wetland plant species lists (recalculated from Hassall et al., 2012). For English headwater  
476 streams, Countryside Survey data showed the reverse trend, with stream plant alpha  
477 richness increasing significantly between 1998 and 2007 (Dunbar et al., 2010). This  
478 contrasts both with our findings, and with the majority of data from studies of larger  
479 European watercourses, which typically show declining alpha and/or gamma plant richness  
480 over recent decades (Ris and Sand-Jensen, 2001; Gerhard et al., 2016; Schütz et al., 2008;

481 Steffen, 2013). Comparable data for headwater ditches are hard to come by, with almost all  
482 longitudinal studies focused on the wetland flora of more permanent ditches on floodplains,  
483 coastal wetlands or semi-natural wetlands, rather than the small, and often seasonal ditches  
484 typical of England's agricultural countryside (Best, 1995; Drake et al., 2010; Whatley, 2013).  
485 The main exception is, again, the UK Countryside Survey, which in contrast to our findings,  
486 suggests that mean wetland alpha plant richness in headwater ditches increased in the  
487 decade before our study was undertaken (Dunbar et al., 2010). Overall, therefore, the results  
488 for individual waterbody types provide evidence of a systematic continued loss of plant  
489 diversity from agricultural ponds in England's lowlands, but suggest that trends in stream  
490 and ditch flora may be more temporally or spatially variable in agricultural headwaters.

491

## 492 **6.2 Future losses**

493 Looking forwards, it is clear that a high proportion of the wetland flora in our survey area  
494 remains vulnerable to further loss. During the 2010-2018 survey period we directly observed  
495 the extinction of species from all catchments and waterbody types through habitat change  
496 and destruction including culverting of springs, afforestation of fens and cessation of grazing  
497 along waterbody margins. Given that a third (34%) of our catchments' remaining plant  
498 species were restricted to two or fewer sites, and almost a quarter (23%) of these species  
499 occurred at exceptionally low abundance, the risk of further loss as a direct result of habitat  
500 impacts seems considerable. An additional threat comes from the extent of habitat isolation  
501 inherent in many agricultural landscapes (Bosiacka et al., 2008). Both theoretical and  
502 empirical studies of extinction debt (Tilman et al., 1994; Loehle and Li, 1996) have shown  
503 that fragmented habitats with very small populations have high species extinction rates  
504 (Halley et al., 2016). Indeed the risk may be especially high for wetland plants located in  
505 spatially discrete wetlands, including ponds (Deane et al., 2017; Deane and He, 2018). This  
506 suggests an particular vulnerability in our catchments where the majority (over 80%) of plant  
507 species with highly restricted distribution occur only in ponds. Ponds also supported the  
508 greatest number of rare species in our catchments and, particularly in the Barkby, suffered  
509 considerable loss of these taxa during the nine-year study. Extinction debt is held to be  
510 especially likely for rare species (Dullinger et al., 2013), which may help to explain why loss  
511 of rare species from our catchments has been so high and indicates that the demise of the  
512 rare taxa remaining in our catchments may continue.

513

## 514 **6.3 Biodiversity gain from nature based measures**

515 The addition of nature based measures brought almost immediate biodiversity gains to the  
516 two catchments in which they were introduced. The creation of clean water ponds, in  
517 particular, more than compensated for recent losses and, after five years, had increased  
518 whole catchment richness by approximately a quarter and tripled the number of rare plant  
519 species present. The rapid colonization rates observed in new nature based ponds is not  
520 entirely unexpected. Authors from Darwin onwards have noted the mobility of many  
521 freshwater taxa (Darwin, 1859; Talling, 1951; Soons, 2006) whilst other studies have shown  
522 that ponds can develop rich plant assemblages within five to six years (Williams, 2010;  
523 Mitsch, 2012). New clean water ponds have sometimes been shown to be richer than pre-  
524 existing ponds within two to three years (Parikh and Gale, 1998; Williams et al., 2010).

525

526 The unusually high proportion of rare species that appeared in the catchment's clean water  
527 ponds is more surprising, but still not unprecedented. Williams et al. (1998) showed that 6-12  
528 year-old ponds supported more uncommon plant species than older ponds in lowland  
529 Britain, whilst Fleury and Perrin (2004), found that populations of threatened temporary pond  
530 plants were greatest in the first 2-3 years after ponds were created. Beyond this, there are  
531 many anecdotal examples of nationally rare plant species appearing in newly created ponds,  
532 particularly when they are located in semi-natural habitats (e.g. Barnes, 1983; Kennison,  
533 1986; Erskine et al., 2018).

534

535 The reason that rare plant species show a propensity to colonise new ponds is not  
536 completely clear. Rare species are often held to be poor competitors (Buchele et al., 1992;  
537 Shimada and Ishihama, 2000; Lloyd et al., 2002; Cacho and Strauss, 2014) and the bare  
538 substrates of new ponds may provide a competitor-free zone in the first few years after  
539 creation. Equally, recently excavated waterbodies tend to have relatively nutrient-poor  
540 substrates which may directly benefit groups including charophytes that have been shown to  
541 thrive below relatively low nutrient thresholds (Lambert and Davy, 2011). Alternatively,  
542 remnants of soil left after pond creation may simply have exposed previously buried seed  
543 banks, allowing rare plants that are no longer present in the standing flora to germinate  
544 (Nishihiro et al., 2005). In our study, it seems likely that more than one factor was at play. A  
545 proportion of the nationally and regionally rare species that we recorded (e.g. *Triglochin*  
546 *palustris*, *Juncus subnodulosus*, *Isolepis setacea*) appeared only in ponds created in an area  
547 of secondary woodland partly planted on a former fen. *Triglochin palustris*, at least, had  
548 previously been recorded from the fen, and although our pre-excavation surveys did not find  
549 it in the area where the ponds were created, there seems a high likelihood that this species  
550 germinated from a pre-existing seed bank. Other taxa, including *Hippuris vulgaris* and *Chara*  
551 species, appeared in new ponds that were located in isolated dry ground areas where  
552 colonising species can only have arrived through wind or bird transported propagules (Soons,  
553 2006; Merel et al., 2008). Here, their successful colonisation presumably reflects the new  
554 opportunities provided by the ponds' bare substrates.  
555

#### 556 **6.4 Resilience**

557 It can be argued that both the clean water ponds and ecosystem services waterbodies,  
558 added resilience to the catchments in our study, although the clean water ponds made a  
559 substantially greater contribution. Resilience has been measured in many ways (Cumming et  
560 al., 2005; Timpane-Padgham et al., 2017; Beller et al., 2018). Species richness is a common  
561 metric, with both alpha and gamma richness linked to increased resource use and  
562 community potential to resist, or recover from, environmental stresses (Duffy 2009, Seavy et  
563 al., 2009; Mariotte et al., 2013; Hisano et al., 2018). As noted above, both the ecosystem  
564 services waterbodies, and particularly the clean water ponds, increased catchment richness.  
565 Population size, another correlate of resilience (Stubbington, 2012; Hill, 2016; Aalto, 2019),  
566 also increased as a result of adding nature based measures: creating new sites for species  
567 that, without them, would be present only as uniques or doubles.  
568

569 The physical creation of the new waterbodies themselves added a range of catchment-scale  
570 attributes held to confer resilience. Total area has consistently proven to be a critical metric  
571 linked to long-term habitat resilience (Seavy et al., 2009; Angelini and Silliman, 2012;  
572 Ziegler et al., 2017; Fahrig, L., 2019). In our experimental catchments, adding nature based  
573 measures increased the area of standing waters by a third, with a 9% gain if all waterbody  
574 types are included. Habitat proximity, another widely cited metric with links to dispersal  
575 potential and connectivity among populations and communities also increased (Caissie,  
576 2006; Thiere et al., 2009; Chester and Robson, 2011; Ruhí et al., 2016; Schofield et al.,  
577 2018), particularly in the Stonton catchment where addition of both ecosystem services  
578 waterbodies and new clean water ponds reduced nearest neighbour distances by 64%.  
579 Beyond this, it is possible that short-term resilience within the experimental catchments has  
580 improved as a result of greater habitat heterogeneity (Pope et al., 2000; Folke et al., 2004;  
581 Krosby et al., 2010; Brauns et al., 2011), particularly through the provision of new unshaded,  
582 early succession habitats which were previously uncommon in our catchments. In the  
583 Stonton catchment, the addition of clean water ponds may also provide a longer-term  
584 resilience benefit through the provision of habitats of higher than average quality (Niemi et  
585 al., 1990; Brauns et al., 2011).  
586

587 Our data provide circumstantial evidence that factors linked to the greater spatial  
588 connectivity provided by the nature based measures may have, indeed, conferred greater

589 catchment resilience. Of the three catchments, the Stonton, which received the greatest  
590 number and widest range of nature based measures, also saw the lowest levels of  
591 background species loss. Similarly, the only pre-existing catchment waterbodies to increase  
592 in mean richness during the survey period were the Stonton ponds; the habitat type which  
593 would be expected to benefit most from the increased connectivity and dispersal  
594 opportunities created by adding new ponds in their vicinity. Looking in detail at species  
595 trends provides evidence to support this. For example, the submerged aquatic *Potamogeton*  
596 *pusillus*, was not present in the Stonton catchment before the nature-based measures were  
597 introduced. However, it rapidly colonised a number of the new clean water ponds, and was  
598 subsequently recorded in first one, and then a second pre-existing pond, around 1 km  
599 distant, providing a strong indication that the new ponds acted as a stepping stone habitat  
600 that ultimately led to greater alpha and gamma richness in the Stonton's pre-existing  
601 waterbodies.

602

### 603 **6.5 Effectiveness of ecosystem services waterbodies**

604 There is often an assumption that nature based measures will be 'good for wildlife', and that  
605 ecosystem services features, such as SUDs waterbodies, agricultural bunded ditches and  
606 interception ponds will inevitably provide multi-functional benefits that include biodiversity  
607 gain (Burgess-Gamble et al., 2017). In practice, studies to test these assumptions have  
608 shown mixed results depending on the type of measures introduced and the biotic group  
609 used to derive metrics (Hansson et al., 2005; Thiere et al., 2009; Wiegleb et al., 2017). The  
610 results from our plant-based study provides some support for the value of ecosystem  
611 services waterbodies, particularly for reversing the impact of short term losses in catchment  
612 plant richness, and increasing the number of populations of some unique and replicate  
613 species. However, ecosystem services waterbodies did not restore the loss of rare plant  
614 species from our catchments and fell far short of clean water ponds in the extent to which  
615 they increased catchment resilience. These findings tally with the majority of other plant-  
616 based studies of waterbodies and wetlands which have shown that ecosystem service  
617 features tend to support more homogeneous communities, and fewer high quality or rare  
618 plant species, than their semi-natural equivalents (Balcombe et al., 2005; Brooks et al.,  
619 2005; Aronson and Galatowitsch, 2008; Robertson et al., 2018; Price et al., 2019). Taken  
620 together, these findings suggest a need for some caution, or at least realism, when  
621 promoting the value of ecosystem services waterbodies for plant biodiversity, particularly  
622 where waterbodies are on-line and inevitably compromised by pollutant inputs.

623

### 624 **6.6 Will the gains persist?**

625 Whether the biodiversity gains contributed by the nature-based measures will persist in the  
626 longer-term remains an open question. Evidence from other new clean water ponds shows  
627 that this waterbody type can retain high biodiversity for many decades (Williams et al., 2007,  
628 Williams et al., 2010). However, in the majority of cases these ponds were created in semi-  
629 natural landscapes and further monitoring is required to determine whether the clean water  
630 ponds in our agricultural landscapes can maintain their disproportionate contribution to  
631 catchment biodiversity in the longer term. The future biodiversity benefits from the  
632 ecosystem services ponds seems more doubtful. Evidence suggests that new ponds in  
633 highly impacted landscapes tend to reach their greatest richness within the first five years  
634 after creation and then decline. This is almost certainly because they degrade once they  
635 begin to fill with polluted sediment and water (Williams, 2007 Robertson et al., 2018). For on-  
636 line ecosystem service features like ours, where the waterbody's main function is to intercept  
637 polluted sediment and water, short to medium term declines in biodiversity value seem likely.  
638 Some decline is already evident from our data: a number of ecosystem services waterbodies  
639 supported uncommon plants (*Potamogeton* and *Chara* species) in the first few years after  
640 creation which were rapidly lost as these features began to fill with sediment and became  
641 more algal dominated. It is possible that regularly desilting ecosystem services waterbodies  
642 may be able to remove sediment and pollutants and return them to an earlier, and

643 botanically richer successional stage, but this possibility is yet to be tested. Further  
644 surveillance data are essential to measure both the extent of further losses, and the potential  
645 for de-silting to reset the clock.

## 647 **7 Implications**

### 648 **7.1 The value of gamma richness data**

649 Alpha richness measures remain a mainstay of ecological research. However, over the last  
650 few decades there has been an increasing trend towards collection of gamma data,  
651 particularly for freshwater habitats (Bubíková and Hrivnák, 2018). Most studies measure  
652 gamma richness as summed alpha values rather than adopting what can sometimes be an  
653 impossibly time consuming census approach. In this study we used wetland plants which are  
654 a relatively quick and easy group to survey in order to undertake census surveys of  
655 waterbodies, and found that this provided advantages for assessing catchment-scale  
656 change. For example, alpha data could not provide evidence that the observed species  
657 losses were real because between-year variability in site richness confounded statistical  
658 significance tests. Gamma census data, which reveal the real world, not only enabled us to  
659 measure losses and gains over the relatively short time-scale of the project, but provided  
660 confidence in measuring resilience attributes such as the number of restricted species, area  
661 of occupancy, and species movement between waterbodies. We suggest that census data  
662 could be useful for other freshwater studies, particularly to identify trends over short  
663 timescales where changes are likely to be subtle. Census studies that investigate the net  
664 change across a wider range of landscapes (agricultural, urban or semi-natural) would be  
665 particularly welcome in order to place the results recorded here in a wider context.

### 667 **7.2 Ponds as catchment controlling habitats**

668 Our findings suggest that ponds were a lynchpin habitat in the agricultural catchments that  
669 we studied. By a considerable margin, ponds supported the greatest number of freshwater  
670 plant species, the most uncommon species and the highest proportion of unique taxa, with  
671 40% of species only found in ponds. Loss of pond species, particularly submerged aquatic  
672 taxa, had a disproportionately high impact on catchment richness and rarity trends.

673  
674 Recognition of the importance of ponds for supporting catchment biodiversity has been  
675 growing for almost two decades (reviewed in Biggs et al., 2017 and Hill et al., 2018). Calls  
676 for greater representation of ponds within national and international policy have been  
677 growing apace (Williams et al., 2004; Kristensen and Globevnik, 2014; Sayer, 2014; Hassall,  
678 2014; Biggs et al., 2017). Yet there is still no requirement to monitor ponds as part of water  
679 quality assessment in Europe, the US or other countries where river monitoring is mandatory  
680 (Hill et al., 2018). Equally lacking are water and nature conservation policies that support  
681 pond protection at site or catchment level (e.g. River Basin Management Plans) despite  
682 increasing evidence that, *en masse*, small habitats like ponds are critical for maintaining  
683 landscape scale biodiversity (Hill et al., 2018; Grasel et al., 2018; Fahrig, 2019). The  
684 evidence from our study adds further weight to the argument that ponds need to be  
685 specifically included in policy and legislation if we are to reduce freshwater biodiversity loss  
686 and stand a chance of making sustainable catchment management a reality.

### 688 **7.3 Good news for biodiversity protection**

689 Amidst the gloomy reality of global declines in freshwater habitats and species, the results  
690 from this study provide evidence that proactive habitat creation measures can make a  
691 positive difference to agricultural catchment-scale biodiversity over comparatively short time  
692 scales. Our results provide the first demonstration of a whole-landscape increase in  
693 freshwater biodiversity as a result of agricultural land management measures. The findings  
694 emphasise the potential for clean water pond creation to bring significant benefits to  
695 catchment biodiversity and resilience in agricultural landscapes.

696

## 697 **8 Acknowledgements**

698 This work was supported by the Environment Agency (Grants CRF013 and  
699 ENVREAN002188) and by Syngenta Ltd who funded a Post-Doctoral Research Assistant  
700 post as part of the project from 2010-15. We are enormously grateful to the landowners and  
701 tenants in all catchments for granting access to sampling sites, and particularly to  
702 landowners in the Eye and Stonton catchments for their close involvement with the  
703 introduction of measures for the project. Thanks to Sian Davies, Anita Casey, Adrianna  
704 Hawczak and Elaine McGoff for their practical and technical support. We are also pleased to  
705 acknowledge the advice and guidance provided by Lorriane Maltby, the Welland Valley  
706 Partnership and Welland Rivers Trust, and to Bill Brierley who helped initiate the project.  
707

## 708 **9 References**

- 709 Aalto, E.A., Micheli, F., Boch, C.A., Espinoza Montes, J.A., Woodson, C.B. and De Leo,  
710 G.A., 2019. Catastrophic Mortality, Allee Effects, and Marine Protected Areas. *The American*  
711 *Naturalist*, 193(3), pp.391-408. <https://doi.org/10.1086/701781>
- 712 Angelini, C. and Silliman, B.R., 2012. Patch size-dependent community recovery after  
713 massive disturbance. *Ecology*, 93(1), pp.101-110. <https://doi.org/10.1890/11-0557.1>
- 714 Aronson, M.F. and Galatowitsch, S., 2008. Long-term vegetation development of restored  
715 prairie pothole wetlands. *Wetlands*, 28(4), pp.883-895. <https://doi.org/10.1672/08-142.1>
- 716 Balcombe, C.K., Anderson, J.T., Fortney, R.H., Rentch, J.S., Grafton, W.N. and Kordek,  
717 W.S., 2005. A comparison of plant communities in mitigation and reference wetlands in the  
718 mid-Appalachians. *Wetlands*, 25(1), pp.130-142. [10.1672/0277-  
719 5212\(2005\)025\[0130:ACOPCI\]2.0.CO;2](https://doi.org/10.1672/0277-5212(2005)025[0130:ACOPCI]2.0.CO;2)
- 720 Barnes, L.E., 1983. The colonization of ball-clay ponds by macroinvertebrates and  
721 macrophytes. *Freshwater Biology*, 13(6), pp.561-578. [https://doi.org/10.1111/j.1365-  
722 2427.1983.tb00013.x](https://doi.org/10.1111/j.1365-2427.1983.tb00013.x)
- 723 Beller, E.E., Spotswood, E.N., Robinson, A.H., Anderson, M.G., Higgs, E.S., Hobbs, R.J.,  
724 Suding, K.N., Zavaleta, E.S., Grenier, J.L. and Grossinger, R.M., 2018. Building Ecological  
725 Resilience in Highly Modified Landscapes. *BioScience*, 69(1), pp.80-92.  
726 <https://doi.org/10.1093/biosci/biy117>
- 727 Bernhardt, E.S. and Palmer, M.A., 2011. River restoration: the fuzzy logic of repairing  
728 reaches to reverse catchment scale degradation. *Ecological applications*, 21(6), pp.1926-  
729 1931. <https://doi.org/10.1890/10-1574.1>
- 730 Best, E.P.H., Van der Schaaf, S. and Oomes, M.J.M., 1995. Responses of restored  
731 grassland ditch vegetation to hydrological changes, 1989–1992. *Vegetatio*, 116(2), pp.107-  
732 122. <https://doi.org/10.1007/BF00045302>
- 733 Biggs, J., Stoate, S., Williams, P., Brown, C., Casey, A., Davies, S., Diego, I.G., Hawczak,  
734 A., Kizuka, T., McGoff, E. and Szczur, J., 2014. *Water Friendly Farming: Results and*  
735 *practical implications of the first 3 years of the programme*. Freshwater Habitats Trust,  
736 Oxford, and Game and Wildlife Conservation Trust, Fordingbridge, UK.
- 737 Biggs, J., Von Fumetti, S. and Kelly-Quinn, M., 2017. The importance of small  
738 waterbodies for biodiversity and ecosystem services: implications for policy  
739 makers. *Hydrobiologia*, 793(1), pp.3-39. <https://doi.org/10.1007/s10750-016-3007-0>
- 740 Bosiacka, B., Pacewicz, K. and Pienkowski, P., 2008. Spatial analysis of plant species  
741 distribution among small water bodies in a agricultural landscape. *Acta agrobotanica*, 61(2).
- 742 Brauns, M., Gücker, B., Wagner, C., Garcia, X.F., Walz, N. and Pusch, M.T., 2011.  
743 Human lakeshore development alters the structure and trophic basis of littoral food  
744 webs. *Journal of Applied Ecology*, 48(4), pp.916-925. [https://doi.org/10.1111/j.1365-  
745 2664.2011.02007.x](https://doi.org/10.1111/j.1365-2664.2011.02007.x)

- 746 Brönmark, C. and Hansson, L.A., 2002. Environmental issues in lakes and ponds: current  
747 state and perspectives. *Environmental Conservation*, 29(3), pp.290-307.  
748 <https://doi.org/10.1017/S0376892902000218>
- 749 Brooks, R.P., Wardrop, D.H., Cole, C.A. and Campbell, D.A., 2005. Are we purveyors of  
750 wetland homogeneity?: A model of degradation and restoration to improve wetland  
751 mitigation performance. *Ecological Engineering*, 24(4), pp.331-340.  
752 <https://doi.org/10.1016/j.ecoleng.2004.07.009>
- 753 Brown, C.D., Turner, N., Hollis, J., Bellamy, P., Biggs, J., Williams, P., Arnold, D., Pepper,  
754 T. and Maund, S., 2006. Morphological and physico-chemical properties of British aquatic  
755 habitats potentially exposed to pesticides. *Agriculture, ecosystems & environment*, 113(1-4),  
756 pp.307-319. <https://doi.org/10.1016/j.agee.2005.10.015>
- 757 BSBI maps. 2019. Species recorded during the period 2000 to 2018.  
758 <https://bsbi.org/maps>. Accessed 15<sup>th</sup> February 2019.
- 759 Bubíková, K. and Hrivnák, R., 2018. Comparative macrophyte diversity of waterbodies in  
760 the Central European landscape. *Wetlands*, 38(3), pp.451-459.  
761 <https://doi.org/10.1007/s13157-017-0987-0>
- 762 Buchele, D.E., Baskin, J.M. and Baskin, C.C., 1992. Ecology of the endangered species  
763 *Solidago shortii*. V. Plant associates. *Bulletin of the Torrey Botanical Club*, pp.208-213.  
764 <https://doi.org/10.2307/2997032>
- 765 Burgess-Gamble, L., Ngai, R., Wilkinson, M., Nisbet, T., Pontee, N., Harvey, R., Kipling,  
766 K., Addy, S., Rose, S., Maslen, S. and Jay, H., 2017. Working with Natural Processes—  
767 Evidence Directory. *Environmental Agency, Report No. SC150005*.
- 768 Cacho, N.I. and Strauss, S.Y., 2014. Occupation of bare habitats, an evolutionary precursor to  
769 soil specialization in plants. *Proceedings of the National Academy of Sciences*, 111(42),  
770 pp.15132-15137. <https://doi.org/10.1073/pnas.1409242111>
- 771 Caissie, D., 2006. The thermal regime of rivers: a review. *Freshwater biology*, 51(8),  
772 pp.1389-1406. <https://doi.org/10.1111/j.1365-2427.2006.01597.x>
- 773 Carvalho, L., Mackay, E.B., Cardoso, A.C., Baattrup-Pedersen, A., Birk, S., Blackstock,  
774 K.L., Borics, G., Borja, A., Feld, C.K., Ferreira, M.T. and Globevnik, L., 2019. Protecting and  
775 restoring Europe's waters: An analysis of the future development needs of the Water  
776 Framework Directive. *Science of the Total Environment*, 658, pp.1228-1238.  
777 <https://doi.org/10.1016/j.scitotenv.2018.12.255>
- 778 Céréghino, R., Biggs, J., Oertli, B. and Declerck, S., 2007. The ecology of European  
779 ponds: defining the characteristics of a neglected freshwater habitat. In *Pond Conservation*  
780 *in Europe*(pp. 1-6). Springer, Dordrecht. <https://doi.org/10.1007/s10750-007-9225-8>
- 781 Chester, E.T. and Robson, B.J., 2011. Drought refuges, spatial scale and recolonisation  
782 by invertebrates in non-perennial streams. *Freshwater Biology*, 56(10), pp.2094-2104.  
783 <https://doi.org/10.1111/j.1365-2427.2011.02644.x>
- 784 Colwell, R.K., Chao, A., Gotelli, N.J., Lin, S.Y., Mao, C.X., Chazdon, R.L. and Longino,  
785 J.T., 2012. Models and estimators linking individual-based and sample-based rarefaction,  
786 extrapolation and comparison of assemblages. *Journal of plant ecology*, 5(1), pp.3-21.  
787 <https://doi.org/10.1093/jpe/rtr044>
- 788 Cuttle, S.P., Newell-Price, J.P., Harris, D., Chadwick, D.R., Shepherd, M.A., Anthony,  
789 S.G.A., Macleod, C.J.A., Haygarth, P.M. and Chambers, B.J., 2016. A method-centric 'User  
790 Manual'for the mitigation of diffuse water pollution from agriculture. *Soil Use and*  
791 *Management*, 32, pp.162-171. <https://doi.org/10.1111/sum.12242>
- 792 Darwin, C., 1859. *The Origin of Species; And, the Descent of Man*. Modern library.
- 793 Davies, B., Biggs, J., Williams, P., Whitfield, M., Nicolet, P., Sear, D., Bray, S. and  
794 Maund, S., 2008. Comparative biodiversity of aquatic habitats in the European agricultural  
795 landscape. *Agriculture, Ecosystems & Environment*, 125(1-4), pp.1-8.  
796 <https://doi.org/10.1016/j.agee.2007.10.006>
- 797 Deane, D.C. and He, F., 2018. Loss of only the smallest patches will reduce species  
798 diversity in most discrete habitat networks. *Global change biology*, 24(12), pp.5802-5814.  
799 <https://doi.org/10.1111/gcb.14452>

- 800 Deane, D.C., Fordham, D.A., He, F. and Bradshaw, C.J., 2017. Future extinction risk of  
801 wetland plants is higher from individual patch loss than total area reduction. *Biological*  
802 *Conservation*, 209, pp.27-33. <https://doi.org/10.1016/j.biocon.2017.02.005>
- 803 Defra, 2018. The guide to cross compliance in England 2018.  
804 [https://assets.publishing.service.gov.uk/government/uploads/system/uploads/attachment\\_data/file/668684/Cross\\_Compliance\\_2018\\_guide\\_v1.0.pdf](https://assets.publishing.service.gov.uk/government/uploads/system/uploads/attachment_data/file/668684/Cross_Compliance_2018_guide_v1.0.pdf) (accessed 13 April 2019)
- 805 Drake, C.M., Stewart, N.F., Palmer, M.A. and Kindemba, V.L., 2010. The ecological  
806 status of ditch systems: an investigation into the current status of the aquatic invertebrate  
807 and plant communities of grazing marsh ditch systems in England and Wales. *Buglife-The*  
808 *Invertebrate Conservation Trust: Peterborough, UK*.
- 809 Duffy, J.E., 2009. Why biodiversity is important to the functioning of real-world  
810 ecosystems. *Frontiers in Ecology and the Environment*, 7(8), pp.437-444.  
811 <https://doi.org/10.1890/070195>
- 812 Dullinger, S., Essl, F., Rabitsch, W., Erb, K.H., Gingrich, S., Haberl, H., Hülber, K.,  
813 Jarošik, V., Krausmann, F., Kühn, I. and Pergl, J., 2013. Europe's other debt crisis caused  
814 by the long legacy of future extinctions. *Proceedings of the National Academy of*  
815 *Sciences*, 110(18), pp.7342-7347. <https://doi.org/10.1073/pnas.1216303110>
- 816 Dunbar, M., Murphy, J., Clarke, R., Baker, R., Davies, C., Scarlett, P. 2010 Countryside  
817 Survey: Headwater Streams Report from 2007. Technical Report No. 8/07 NERC/Centre for  
818 Ecology & Hydrology pp 67.
- 819 Erskine, S.E., Killick, H.J., Lambrick C.R. and Lee E.M., 2018. *Oxfordshire's Threatened*  
820 *Plants*. Pisces Publications.
- 821 Fahrig, L., 2019. Habitat fragmentation: A long and tangled tale. *Global Ecology and*  
822 *Biogeography*, 28(1), pp.33-41. <https://doi.org/10.1111/geb.12839>
- 823 Fleury, Z. and Perrin, C.S., 2004. Vegetation colonisation of temporary ponds newly dug  
824 in the marshes of the Grande Caricaie (lake of Neuchatel, Switzerland). *Archives des*  
825 *Sciences*, 57(2-3), pp.105-112.
- 826 Foley, J.A., DeFries, R., Asner, G.P., Barford, C., Bonan, G., Carpenter, S.R., Chapin,  
827 F.S., Coe, M.T., Daily, G.C., Gibbs, H.K. and Helkowski, J.H., 2005. Global consequences of  
828 land use. *science*, 309(5734), pp.570-574. <https://doi.org/10.1126/science.1111772>
- 829 Folke, C., Carpenter, S., Walker, B., Scheffer, M., Elmqvist, T., Gunderson, L. and  
830 Holling, C.S., 2004. Regime shifts, resilience, and biodiversity in ecosystem  
831 management. *Annu. Rev. Ecol. Evol. Syst.*, 35, pp.557-581.  
832 <https://doi.org/10.1146/annurev.ecolsys.35.021103.105711>
- 833 Freshwater Habitats Trust, 2015. Wetland plant species list.  
834 [https://freshwaterhabitats.org.uk/wp-content/uploads/2015/03/35-WETLAND-PLANTS-](https://freshwaterhabitats.org.uk/wp-content/uploads/2015/03/35-WETLAND-PLANTS-LATIN-RECORDING-FORM-FINAL.pdf)  
835 [LATIN-RECORDING-FORM-FINAL.pdf](https://freshwaterhabitats.org.uk/wp-content/uploads/2015/03/35-WETLAND-PLANTS-LATIN-RECORDING-FORM-FINAL.pdf) (accessed 10 December 2018)
- 836 Freshwater Habitats Trust, 2019. Pond Creation Toolkit  
837 <https://freshwaterhabitats.org.uk/projects/million-ponds/pond-creation-toolkit/> (accessed 20  
838 March 2019).
- 839 Gołdyn, H., 2010. Changes in plant species diversity of aquatic ecosystems in the  
840 agricultural landscape in West Poland in the last 30 years. *Biodiversity and*  
841 *conservation*, 19(1), pp.61-80. <https://doi.org/10.1007/s10531-009-9702-7>
- 842 Gordon, L.J., Peterson, G.D. and Bennett, E.M., 2008. Agricultural modifications of  
843 hydrological flows create ecological surprises. *Trends in ecology & evolution*, 23(4), pp.211-  
844 219. <https://doi.org/10.1016/j.tree.2007.11.011>
- 845 Gotelli, N.J. and Colwell, R.K., 2011. Estimating species richness. *Biological diversity:*  
846 *frontiers in measurement and assessment*, 12, pp.39-54.
- 847 Grasel, D., Mormul, R.P., Bozelli, R.L., Thomaz, S.M. and Jarenkow, J.A., 2018. Brazil's  
848 Native Vegetation Protection Law threatens to collapse pond functions. *Perspectives in*  
849 *ecology and conservation*, 16(4), pp.234-237. <https://doi.org/10.1016/j.pecon.2018.08.003>
- 850 Halley, J.M., Monokrousos, N., Mazaris, A.D., Newmark, W.D. and Vokou, D., 2016.  
851 Dynamics of extinction debt across five taxonomic groups. *Nature communications*, 7,  
852 p.12283. <https://doi.org/10.1038/ncomms12283>
- 853



- 854 Hansson, L.A., Brönmark, C., Anders Nilsson, P. and Åbjörnsson, K., 2005. Conflicting  
855 demands on wetland ecosystem services: nutrient retention, biodiversity or  
856 both?. *Freshwater Biology*, 50(4), pp.705-714. [https://doi.org/10.1111/j.1365-](https://doi.org/10.1111/j.1365-2427.2005.01352.x)  
857 [2427.2005.01352.x](https://doi.org/10.1111/j.1365-2427.2005.01352.x)
- 858 Harris, G.P. and Heathwaite, A.L., 2012. Why is achieving good ecological outcomes in  
859 rivers so difficult?. *Freshwater Biology*, 57, pp.91-107. [https://doi.org/10.1111/j.1365-](https://doi.org/10.1111/j.1365-2427.2011.02640.x)  
860 [2427.2011.02640.x](https://doi.org/10.1111/j.1365-2427.2011.02640.x)
- 861 Hassall, C., 2014. The ecology and biodiversity of urban ponds. *Wiley Interdisciplinary*  
862 *Reviews: Water*, 1(2), pp.187-206. <https://doi.org/10.1002/wat2.1014>
- 863 Hassall, C., Hollinshead, J. and Hull, A., 2012. Temporal dynamics of aquatic  
864 communities and implications for pond conservation. *Biodiversity and Conservation*, 21(3),  
865 pp.829-852. <https://doi.org/10.1007/s10531-011-0223-9>
- 866 Hill, J.E., 2016. Collapse of a reproducing population of non-native African jewelfish  
867 (*Hemichromis letourneuxi*) in a Florida lake. *NeoBiota*, 29, p.35.  
868 <https://doi.org/10.3897/neobiota.29.7213>
- 869 Hill, M.J., Hassall, C., Oertli, B., Fahrig, L., Robson, B.J., Biggs, J., Samways, M.J., Usio,  
870 N., Takamura, N., Krishnaswamy, J. and Wood, P.J., 2018. New policy directions for global  
871 pond conservation. *Conservation Letters*, 11(5), p.e12447.  
872 <https://doi.org/10.1111/conl.12447>
- 873 Hisano, M., Searle, E.B. and Chen, H.Y., 2018. Biodiversity as a solution to mitigate  
874 climate change impacts on the functioning of forest ecosystems. *Biological Reviews*, 93(1),  
875 pp.439-456. <https://doi.org/10.1111/brv.12351>
- 876 JNCC, Conservation designations spreadsheet. Last updated July 2018.  
877 <http://jncc.defra.gov.uk/page-3408>. Accessed 15<sup>th</sup> February 2019
- 878 Kennison, G.C.B., 1986. Preliminary observations on the plant colonisation of  
879 experimental turf ponds in a Broadland fen. *Transactions of the Norfolk Naturalists*  
880 *Society*, 27, pp.193-198.
- 881 Kristensen, P. and Globevnik, L., 2014. European small water bodies. In *Biology and*  
882 *Environment: Proceedings of the Royal Irish Academy* (Vol. 114, No. 3, pp. 281-287). Royal  
883 Irish Academy. <https://doi.org/10.3318/BIOE.2014.13>
- 884 Krosby, M., Tewksbury, J., Haddad, N.M. and Hoekstra, J., 2010. Ecological connectivity  
885 for a changing climate. *Conservation Biology*, 24(6), pp.1686-1689.  
886 <https://doi.org/10.1111/j.1523-1739.2010.01585.x>
- 887 Lambert, S.J. and Davy, A.J., 2011. Water quality as a threat to aquatic plants: discriminating  
888 between the effects of nitrate, phosphate, boron and heavy metals on charophytes. *New*  
889 *Phytologist*, 189(4), pp.1051-1059. <https://doi.org/10.1111/j.1469-8137.2010.03543.x>
- 890 Lloyd, K.M., Lee, W.G. and Wilson, J.B., 2002. Competitive abilities of rare and common  
891 plants: comparisons using *Acaena* (Rosaceae) and *Chionochloa* (Poaceae) from New  
892 Zealand. *Conservation Biology*, 16(4), pp.975-985. [https://doi.org/10.1046/j.1523-](https://doi.org/10.1046/j.1523-1739.2002.01033.x)  
893 [1739.2002.01033.x](https://doi.org/10.1046/j.1523-1739.2002.01033.x)
- 894 Loehle, C. and Li, B.L., 1996. Habitat destruction and the extinction debt  
895 revisited. *Ecological applications*, 6(3), pp.784-789. <https://doi.org/10.2307/2269483>
- 896 Louhi, P., Mykrä, H., Paavola, R., Huusko, A., Vehanen, T., Mäki-Petäys, A. and Muotka,  
897 T., 2011. Twenty years of stream restoration in Finland: little response by benthic  
898 macroinvertebrate communities. *Ecological Applications*, 21(6), pp.1950-1961.  
899 <https://doi.org/10.1890/10-0591.1>
- 900 Mariotte, P., Vandenberghe, C., Kardol, P., Hagedorn, F. and Buttler, A., 2013.  
901 Subordinate plant species enhance community resistance against drought in semi-natural  
902 grasslands. *Journal of Ecology*, 101(3), pp.763-773. [https://doi.org/10.1111/1365-](https://doi.org/10.1111/1365-2745.12064)  
903 [2745.12064](https://doi.org/10.1111/1365-2745.12064)
- 904 Mitsch, W.J., Zhang, L., Stefanik, K.C., Nahlik, A.M., Anderson, C.J., Bernal, B.,  
905 Hernandez, M. and Song, K., 2012. Creating wetlands: primary succession, water quality  
906 changes, and self-design over 15 years. *Bioscience*, 62(3), pp.237-250.  
907 <https://doi.org/10.1525/bio.2012.62.3.5>

- 908 Moss, B., 2007. Water pollution by agriculture. *Philosophical Transactions of the Royal*  
909 *Society B: Biological Sciences*, 363(1491), pp.659-666.  
910 <https://doi.org/10.1098/rstb.2007.2176>
- 911 Niemi, G.J., DeVore, P., Detenbeck, N., Taylor, D., Lima, A., Pastor, J., Yount, J.D. and  
912 Naiman, R.J., 1990. Overview of case studies on recovery of aquatic systems from  
913 disturbance. *Environmental management*, 14(5), pp.571-587.  
914 <https://doi.org/10.1007/BF02394710>
- 915 Nishihiro, J., Nishihiro, M.A. and Washitani, I., 2006. Assessing the potential for recovery  
916 of lakeshore vegetation: species richness of sediment propagule banks. *Ecological*  
917 *Research*, 21(3), pp.436-445. <https://doi.org/10.1007/s11284-005-0133-y>
- 918 Oertli, B., 2018. Freshwater biodiversity conservation: The role of artificial ponds in the  
919 21st century. *Aquatic Conservation: Marine and Freshwater Ecosystems*, 28(2), pp.264-269.  
920 <https://doi.org/10.1002/aqc.2902>
- 921 Palmer, M.A., 2009. Reforming watershed restoration: science in need of application and  
922 applications in need of science. *Estuaries and coasts*, 32(1), pp.1-17.  
923 <https://doi.org/10.1007/s12237-008-9129-5>
- 924 Parikh, A. and Gale, N., 1998. Vegetation monitoring of created dune swale wetlands,  
925 Vandenberg Air Force Base, California. *Restoration Ecology*, 6(1), pp.83-93.  
926 <https://doi.org/10.1046/j.1526-100x.1998.06111.x>
- 927 Pope, S.E., Fahrig, L. and Merriam, H.G., 2000. Landscape complementation and  
928 metapopulation effects on leopard frog populations. *Ecology*, 81(9), pp.2498-2508.  
929 [https://doi.org/10.1890/0012-9658\(2000\)081\[2498:LCAMEO\]2.0.CO;2](https://doi.org/10.1890/0012-9658(2000)081[2498:LCAMEO]2.0.CO;2)
- 930 Price, E.P., Spyreas, G. and Matthews, J.W., 2018. Biotic homogenization of regional  
931 wetland plant communities within short time-scales in the presence of an aggressive  
932 invader. *Journal of Ecology*, 106(3), pp.1180-1190. <https://doi.org/10.1002/eap.1827>
- 933 Rayment, M., 2017. Assessing the costs of Environmental Land Management in the UK.  
934 Rhodes, H.M., Closs, G.P. and Townsend, C.R., 2007. Stream ecosystem health  
935 outcomes of providing information to farmers and adoption of best management  
936 practices. *Journal of applied ecology*, 44(6), pp.1106-1115. <https://doi.org/10.1111/j.1365-2664.2007.01397.x>
- 937  
938 Riis, T. and Sand-Jensen, K., 2001. Historical changes in species composition and  
939 richness accompanying perturbation and eutrophication of Danish lowland streams over 100  
940 years. *Freshwater Biology*, 46(2), pp.269-280. <https://doi.org/10.1046/j.1365-2427.2001.00656.x>
- 941  
942 Robertson, M., Galatowitsch, S.M. and Matthews, J.W., 2018. Longitudinal evaluation of  
943 vegetation richness and cover at wetland compensation sites: implications for regulatory  
944 monitoring under the Clean Water Act. *Wetlands Ecology and Management*, 26(6), pp.1089-  
945 1105. <https://doi.org/10.1007/s11273-018-9633-8>
- 946  
947 Roni, P., Beechie, T., Pess, G. and Hanson, K., 2014. Wood placement in river  
948 restoration: fact, fiction, and future direction. *Canadian Journal of Fisheries and Aquatic*  
949 *Sciences*, 72(3), pp.466-478. <https://doi.org/10.1139/cjfas-2014-0344>
- 950  
951 Ruhí, A., Fairchild, G.W., Spieles, D.J., Becerra-Jurado, G. and Moreno-Mateos, D.,  
952 2016. Invertebrates in created and restored wetlands. In *Invertebrates in Freshwater*  
953 *Wetlands* (pp. 525-564). Springer, Cham.
- 954  
955 Sayer, C.D., 2014. Conservation of aquatic landscapes: ponds, lakes, and rivers as  
956 integrated systems. *Wiley Interdisciplinary Reviews: Water*, 1(6), pp.573-585.  
957 <https://doi.org/10.1002/wat2.1045>
- 958  
959 Schofield, K.A., Alexander, L.C., Ridley, C.E., Vanderhoof, M.K., Fritz, K.M., Autrey, B.C.,  
960 DeMeester, J.E., Kepner, W.G., Lane, C.R., Leibowitz, S.G. and Pollard, A.I., 2018. Biota  
961 connect aquatic habitats throughout freshwater ecosystem mosaics. *JAWRA Journal of the*  
*American Water Resources Association*, 54(2), pp.372-399. <https://doi.org/10.1111/1752-1688.12634>
- 962  
963 Schütz, W., Veit, U. and Kohler, A., 2008. The aquatic vegetation of the Upper Danube  
964 river-past and present. *Large Rivers*, pp.167-191. <https://doi.org/10.1127/lr/18/2008/167>

- 962 Seavy, N.E., Gardali, T., Golet, G.H., Griggs, F.T., Howell, C.A., Kelsey, R., Small, S.L.,  
963 Viers, J.H. and Weigand, J.F., 2009. Why climate change makes riparian restoration more  
964 important than ever: recommendations for practice and research. *Ecological*  
965 *Restoration*, 27(3), pp.330-338. <https://doi.org/10.3368/er.27.3.330>
- 966 Shimada, M. and Ishihama, F., 2000. Asynchronization of local population dynamics and  
967 persistence of a metapopulation: a lesson from an endangered composite plant, *Aster*  
968 *kantoensis*. *Population Ecology*, 42(1), pp.63-72. <https://doi.org/10.1007/s101440050010>
- 969 Soons, M.B., 2006. Wind dispersal in freshwater wetlands: knowledge for conservation  
970 and restoration. *Applied Vegetation Science*, 9(2), pp.271-278.  
971 <https://doi.org/10.1111/j.1654-109X.2006.tb00676.x>
- 972 Soons, M.B., Van Der Vlugt, C., Van Lith, B., Heil, G.W. and Klaassen, M., 2008. Small  
973 seed size increases the potential for dispersal of wetland plants by ducks. *Journal of*  
974 *Ecology*, 96(4), pp.619-627. <https://doi.org/10.1111/j.1365-2745.2008.01372.x>
- 975 Steffen, K., Becker, T., Herr, W. and Leuschner, C., 2013. Diversity loss in the  
976 macrophyte vegetation of northwest German streams and rivers between the 1950s and  
977 2010. *Hydrobiologia*, 713(1), pp.1-17. <https://doi.org/10.1007/s10750-013-1472-2>
- 978 Stroh, P., Leach, S.J., August, T.A., Walker, K.J., Pearman, D.A., Rumsey, F.J.,  
979 Harrower, C.A., Fay, M.F., Martin, J.P., Pankhurst, T., Preston, C.D., Taylor, I., 2014. *A*  
980 *Vascular Plant Red List for England*. Botanical Society of Britain & Ireland.
- 981 Stubbington, R., 2012. The hyporheic zone as an invertebrate refuge: a review of  
982 variability in space, time, taxa and behaviour. *Marine and Freshwater Research*, 63(4),  
983 pp.293-311. <https://doi.org/10.1071/MF11196>
- 984 Talling, J.F., 1951. The element of chance in pond populations. *The Naturalist*, 1951,  
985 pp.157-170.
- 986 Thiere, G., Milenkovski, S., Lindgren, P.E., Sahlén, G., Berglund, O. and Weisner, S.E.,  
987 2009. Wetland creation in agricultural landscapes: biodiversity benefits on local and regional  
988 scales. *Biological conservation*, 142(5), pp.964-973.  
989 <https://doi.org/10.1016/j.biocon.2009.01.006>
- 990 Thomas, R.E., Teel, T., Bruyere, B. and Laurence, S., 2018. Metrics and outcomes of  
991 conservation education: a quarter century of lessons learned. *Environmental Education*  
992 *Research*, pp.1-21. <https://doi.org/10.1080/13504622.2018.1450849>
- 993 Tilman, D., May, R.M., Lehman, C.L. and Nowak, M.A., 1994. Habitat destruction and the  
994 extinction debt. *Nature*, 371(6492), p.65. <https://doi.org/10.1038/371065a0>
- 995 Timpane-Padgham, B.L., Beechie, T. and Klinger, T., 2017. A systematic review of  
996 ecological attributes that confer resilience to climate change in environmental  
997 restoration. *PLoS One*, 12(3), p.e0173812. <https://doi.org/10.1371/journal.pone.0173812>
- 998 Vad, C.F., Péntek, A.L., Cozma, N.J., Földi, A., Tóth, A., Tóth, B., Böde, N.A., Móra, A.,  
999 Ptacnik, R., Ács, É. and Zsuga, K., 2017. Wartime scars or reservoirs of biodiversity? The  
1000 value of bomb crater ponds in aquatic conservation. *Biological conservation*, 209, pp.253-  
1001 262.
- 1002 Whatley, M.H., van Loon, E.E., van Dam, H., Vonk, J.A., van der Geest, H.G. and  
1003 Admiraal, W., 2014. Macrophyte loss drives decadal change in benthic invertebrates in  
1004 peatland drainage ditches. *Freshwater Biology*, 59(1), pp.114-126.  
1005 <https://doi.org/10.1111/fwb.12252>
- 1006 Wiegleb, G., Dahms, H.U., Byeon, W.I. and Choi, G., 2017. To what extent can  
1007 constructed wetlands enhance biodiversity. *International Journal of Environmental Science*  
1008 *and Development*, 8(8), pp.561-569. <https://doi.org/10.18178/ijesd.2017.8.8.1016>
- 1009 Wiegleb, G., Gebler, D., van de Weyer, K. and Birk, S., 2016. Comparative test of  
1010 ecological assessment methods of lowland streams based on long-term monitoring data of  
1011 macrophytes. *Science of the Total Environment*, 541, pp.1269-1281.  
1012 <https://doi.org/10.1016/j.scitotenv.2015.10.005>
- 1013 Williams, P., Biggs, J., Crowe, A., Murphy, J., Nicolet, P., Weatherby, A., Dunbar, M.,  
1014 2010. *Countryside Survey: Ponds Report from 2007. Technical Report No.7/07*. Pond  
1015 Conservation and NERC/Centre for Ecology & Hydrology..

- 1016 Williams, P., Whitfield, M. and Biggs, J., 2007. How can we make new ponds biodiverse?  
1017 A case study monitored over 7 years. In *Pond Conservation in Europe* (pp. 137-148).  
1018 Springer, Dordrecht. [https://doi.org/10.1007/978-90-481-9088-1\\_12](https://doi.org/10.1007/978-90-481-9088-1_12)  
1019 Williams, P., Whitfield, M., Biggs, J., Bray, S., Fox, G., Nicolet, P. and Sear, D., 2004.  
1020 Comparative biodiversity of rivers, streams, ditches and ponds in an agricultural landscape  
1021 in Southern England. *Biological conservation*, 115(2), pp.329-341.  
1022 [https://doi.org/10.1016/S0006-3207\(03\)00153-8](https://doi.org/10.1016/S0006-3207(03)00153-8)  
1023 Williams, P.J., Biggs J, Barr, C.J., Cummins, C.P., Gillespie, M.K., Rich, T.C.G., Baker,  
1024 A., Beesley, J., Corfield, A., Dobson, D., Culling, A.S., Fox, G., Howard, D.C., Luursema, K.,  
1025 Rich, M., Samson, D., Scott, W.A., White, R. and Whitfield, M., 1998. *Lowland Pond Survey*  
1026 1996. Department of the Environment, Transport and the Regions.  
1027 Zelnik, I., Gregorič, N. and Tratnik, A., 2018. Diversity of macroinvertebrates positively  
1028 correlates with diversity of macrophytes in karst ponds. *Ecological Engineering*, 117, pp.96-  
1029 103.  
1030 Zhang, Y., Collins, A.L., Jones, J.I., Johnes, P.J., Inman, A. and Freer, J.E., 2017. The  
1031 potential benefits of on-farm mitigation scenarios for reducing multiple pollutant loadings in  
1032 prioritised agri-environment areas across England. *Environmental Science & Policy*, 73,  
1033 pp.100-114. <https://doi.org/10.1016/j.envsci.2017.04.004>  
1034 Ziegler, J.P., Gregory-Eaves, I. and Solomon, C.T., 2017. Refuge increases food chain  
1035 length: modeled impacts of littoral structure in lake food webs. *Oikos*, 126(9), pp.1347-1356.  
1036 <https://doi.org/10.1111/oik.03517>

**Table 1.** Physical characteristics of the three survey catchments and nature based features added by the project. The table shows the length and number of waterbodies, with their total area in parentheses

| Catchment                         |                                      | Barkby                                                | Eye                                     | Stonton                                               |           |
|-----------------------------------|--------------------------------------|-------------------------------------------------------|-----------------------------------------|-------------------------------------------------------|-----------|
| Treatment                         |                                      | Control                                               | Experimental:<br>ecosystem-<br>services | Experimental:<br>ecosystem-services<br>& biodiversity |           |
| Catchment area (km <sup>2</sup> ) |                                      | 9.6                                                   | 10.6                                    | 9.4                                                   |           |
| Landuse                           | Arable                               | 37%                                                   | 45%                                     | 44%                                                   |           |
|                                   | Grass                                | 52%                                                   | 42%                                     | 41%                                                   |           |
|                                   | Woodland                             | 7%                                                    | 9%                                      | 10%                                                   |           |
|                                   | Settlements & minor<br>landuses      | 4%                                                    | 4%                                      | 5%                                                    |           |
| Pre-existing waterbodies          | Streams: km length (area<br>ha)      | 10.70 (1.53)                                          | 13.45 (1.91)                            | 9.55 (1.34)                                           |           |
|                                   | Ditches: km length (area ha)         | 2.81 (0.28)                                           | 4.27 (0.36)                             | 2.81 (0.36)                                           |           |
|                                   | Ponds: number (area ha)              | 25 (1.12)                                             | 20 (0.46)                               | 20 (2.40)                                             |           |
| Nature<br>based<br>measures       | Ecosystem-<br>services<br>measures   | Earth-bunded ditches and<br>streams: number (area ha) | 0                                       | 9 (0.05)                                              | 12 (0.08) |
|                                   |                                      | Interception<br>ponds:<br>number<br>(area ha)         | 0                                       | 3 (0.04)                                              | 5 (0.04)  |
|                                   | Biodiversity-<br>focused<br>measures | Flood storage<br>ponds                                | 0                                       | 4 (0.13)                                              | 5 (0.08)  |
|                                   |                                      | Clean water ponds: number<br>(area ha)                | 0                                       | 0                                                     | 20 (0.24) |
|                                   |                                      | Debris-dams: number                                   | 0                                       | 0                                                     | 20        |

**Table 2.** Definition of rare species used in the study

Regionally rare species: species recorded from fewer than 15% of 1 km grid squares in a 100 km<sup>2</sup> grid square centred on the project area (BSBI, 2019)

Nationally Scarce: recorded from 16 to 100 10x10 km grid squares in Britain (JNCC, 2019)

Red Listed at England or UK level based on the IUCN categories: Near Threatened, Vulnerable, Endangered or Critically Endangered (Stroh et al., 2014)

**Table 3.** Mann-whitney U-test results comparing the alpha plant richness of nature based measures and pre-existing waterbodies. Statistically significant results in bold

|                                |          | Bunded<br>ditches &<br>streams | Interception<br>ponds | Clean water<br>ponds | Pre-existing<br>ponds | Pre-existing<br>streams | Pre-existing<br>ditches |
|--------------------------------|----------|--------------------------------|-----------------------|----------------------|-----------------------|-------------------------|-------------------------|
| Debris<br>dams                 | U        | 91.500                         | 34.500                | 0.000                | 86.000                | 247.000                 | 305.000                 |
|                                | Z        | -3.124                         | -4.281                | -5.493               | -4.944                | -2.415                  | -1.505                  |
|                                | <i>p</i> | <b>.002</b>                    | <b>&lt;.001</b>       | <b>&lt;.001</b>      | <b>&lt;.001</b>       | <b>.016</b>             | .132                    |
| Bunded<br>ditches &<br>streams | U        |                                | 89.500                | 5.500                | 227.000               | 394.500                 | 291.500                 |
|                                | Z        |                                | -2.822                | -5.427               | -2.946                | -0.390                  | -1.970                  |
|                                | <i>p</i> |                                | <b>.004</b>           | <b>&lt;.001</b>      | <b>.003</b>           | .697                    | <b>.049</b>             |
| Interception<br>ponds          | U        |                                |                       | 32.000               | 358.000               | 198.000                 | 118.500                 |
|                                | Z        |                                |                       | -4.438               | -0.034                | -2.735                  | -4.082                  |
|                                | <i>p</i> |                                |                       | <b>&lt;.001</b>      | .973                  | <b>.006</b>             | <b>&lt;.001</b>         |
| Clean<br>water<br>ponds        | U        |                                |                       |                      | 85.500                | 49.000                  | 7.500                   |
|                                | Z        |                                |                       |                      | -5.091                | -5.645                  | -6.282                  |
|                                | <i>p</i> |                                |                       |                      | <b>&lt;.001</b>       | <b>&lt;.001</b>         | <b>&lt;.001</b>         |

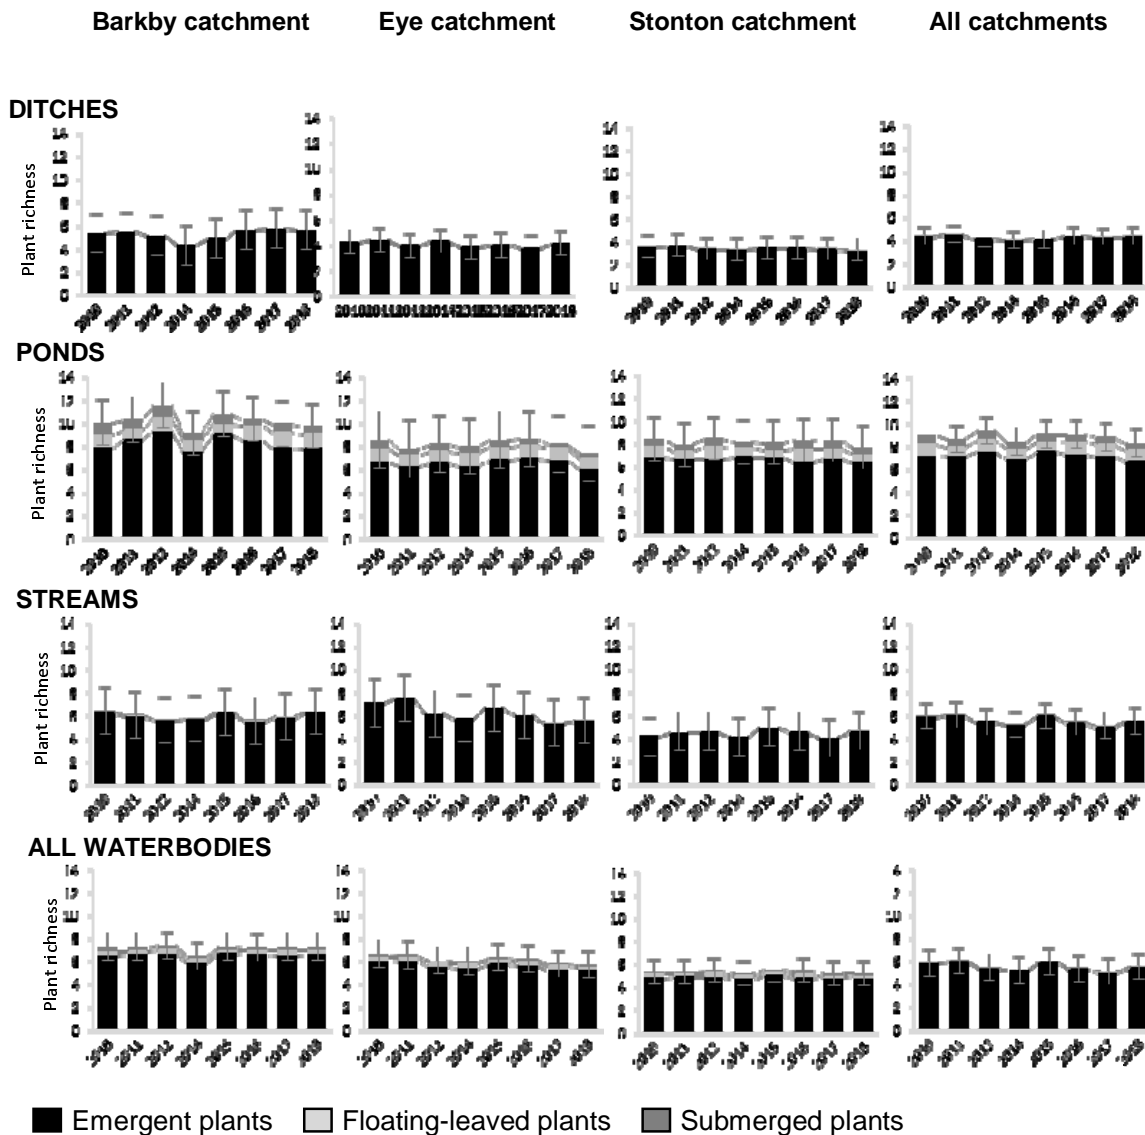

Figure 1. Alpha richness in all waterbody types and catchments: showing the mean number of wetland plant species recorded from annual surveys of 75m<sup>2</sup> plots from 20 ditches, ponds and streams in each of three catchments. No data were collected in 2013 when measures were being introduced. The graphs do *not* include new waterbodies or features added after 2014, and hence show underlying trends in the absence of nature-based measures. Error bars show 95% CLs for total mean richness.

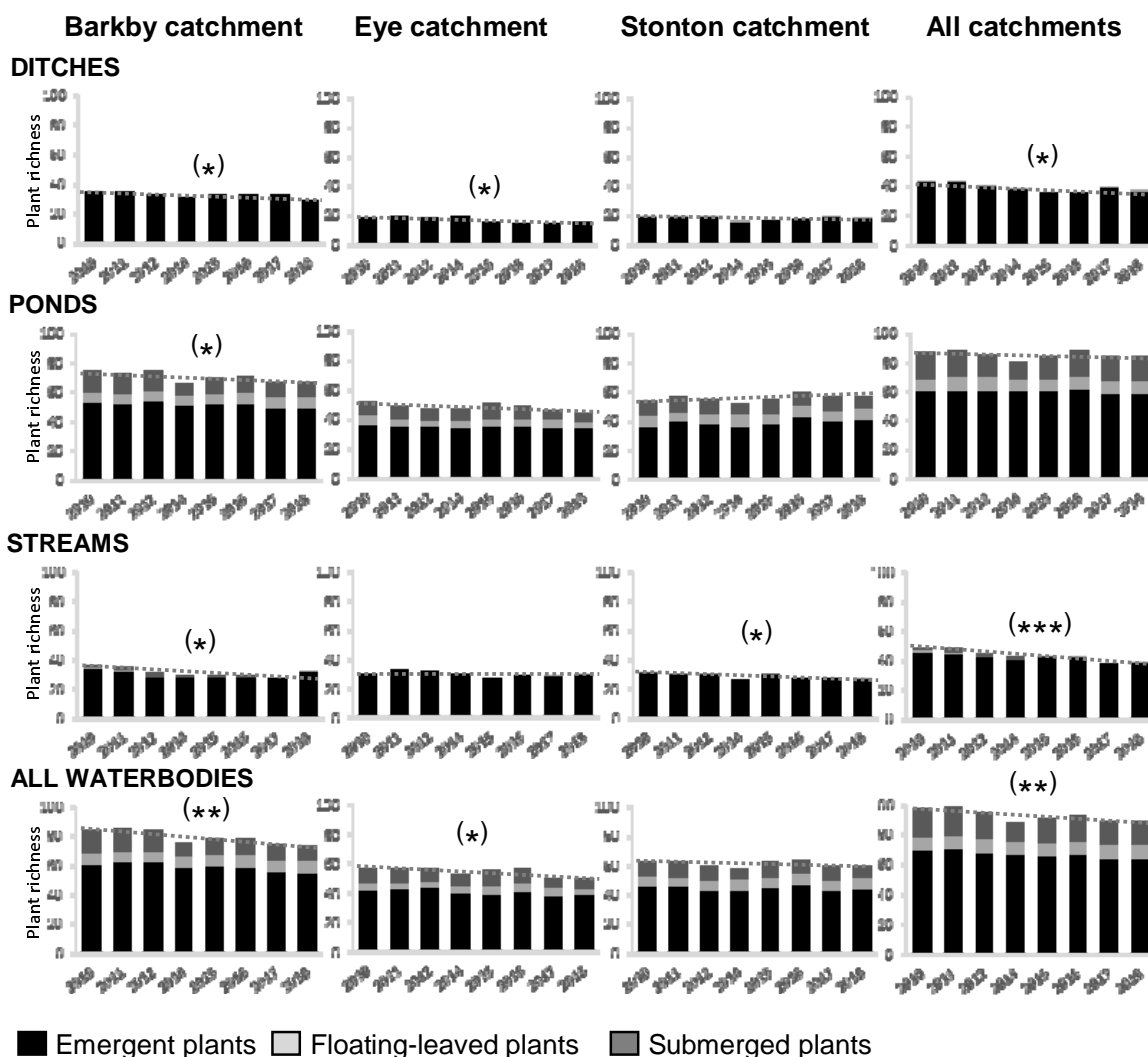

Figure 2. Plant gamma richness for all ditches, ponds and streams in each of three catchments, shown with a line of best fit. No data were collected in 2013 when measures were being implemented. The graphs do *not* include new waterbodies or features added after 2014, and hence show underlying trends in the absence of nature based measures. Dotted lines show the simple linear regression for total plant richness in each waterbody and catchment. Asterisks denote the statistical significance of the regression equation: p-value <0.05 (\*\*), < 0.01 (\*\*), < 0.001 (\*\*\*)



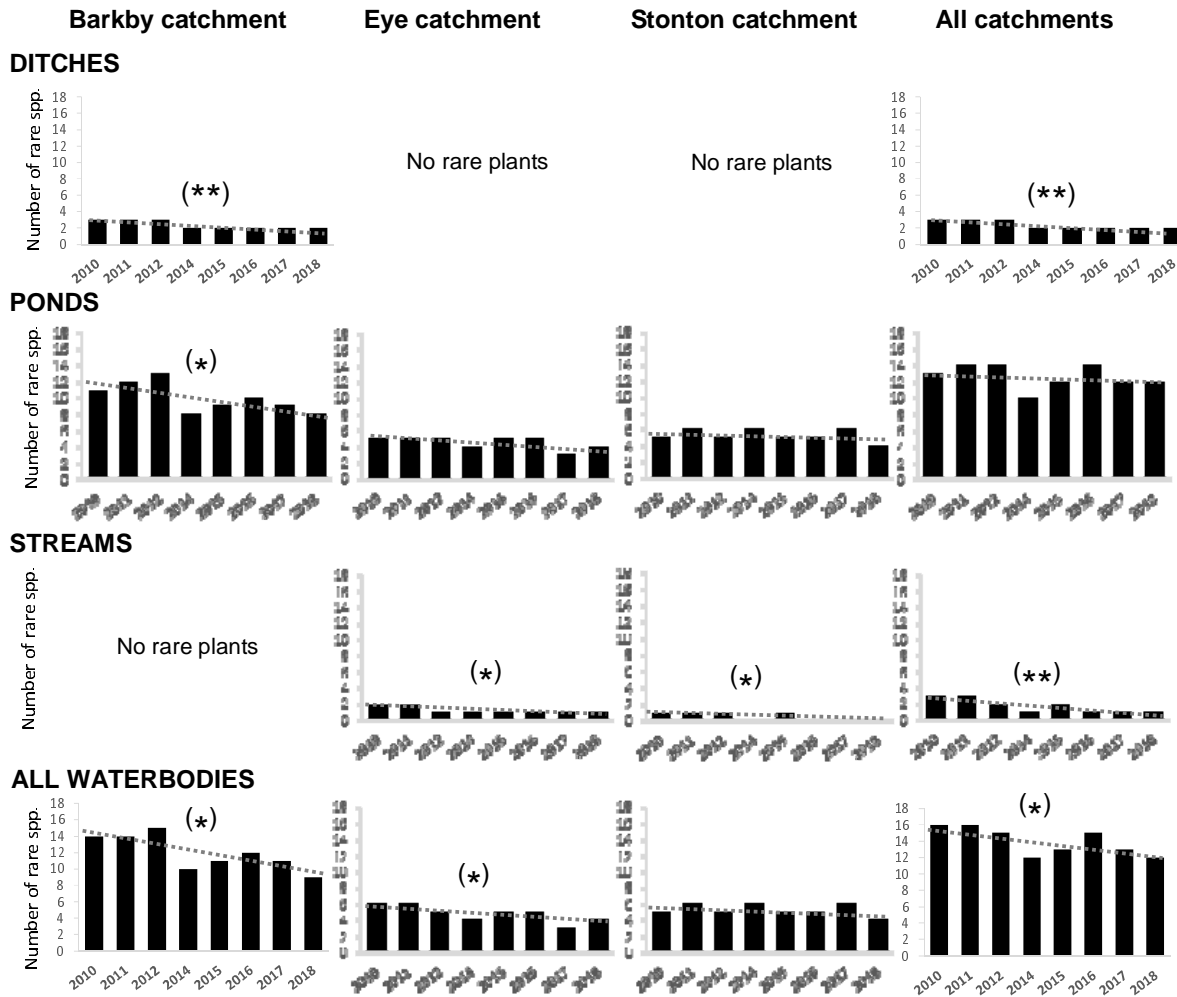

Figure 3. Plant gamma rarity for all ditches, ponds and streams in each of three catchments, shown with a line of best fit. No data were collected in 2013 when measures were being implemented. The graphs do *not* include new waterbodies or features added after 2014, and hence show underlying trends in the absence of nature based measures. Dotted lines show the simple linear regression for total plant richness in each waterbody and catchment. Asterisks denote the statistical significance of the regression equation: p-value <0.05 (\*\*), < 0.01 (\*\*), < 0.001 (\*\*\*)

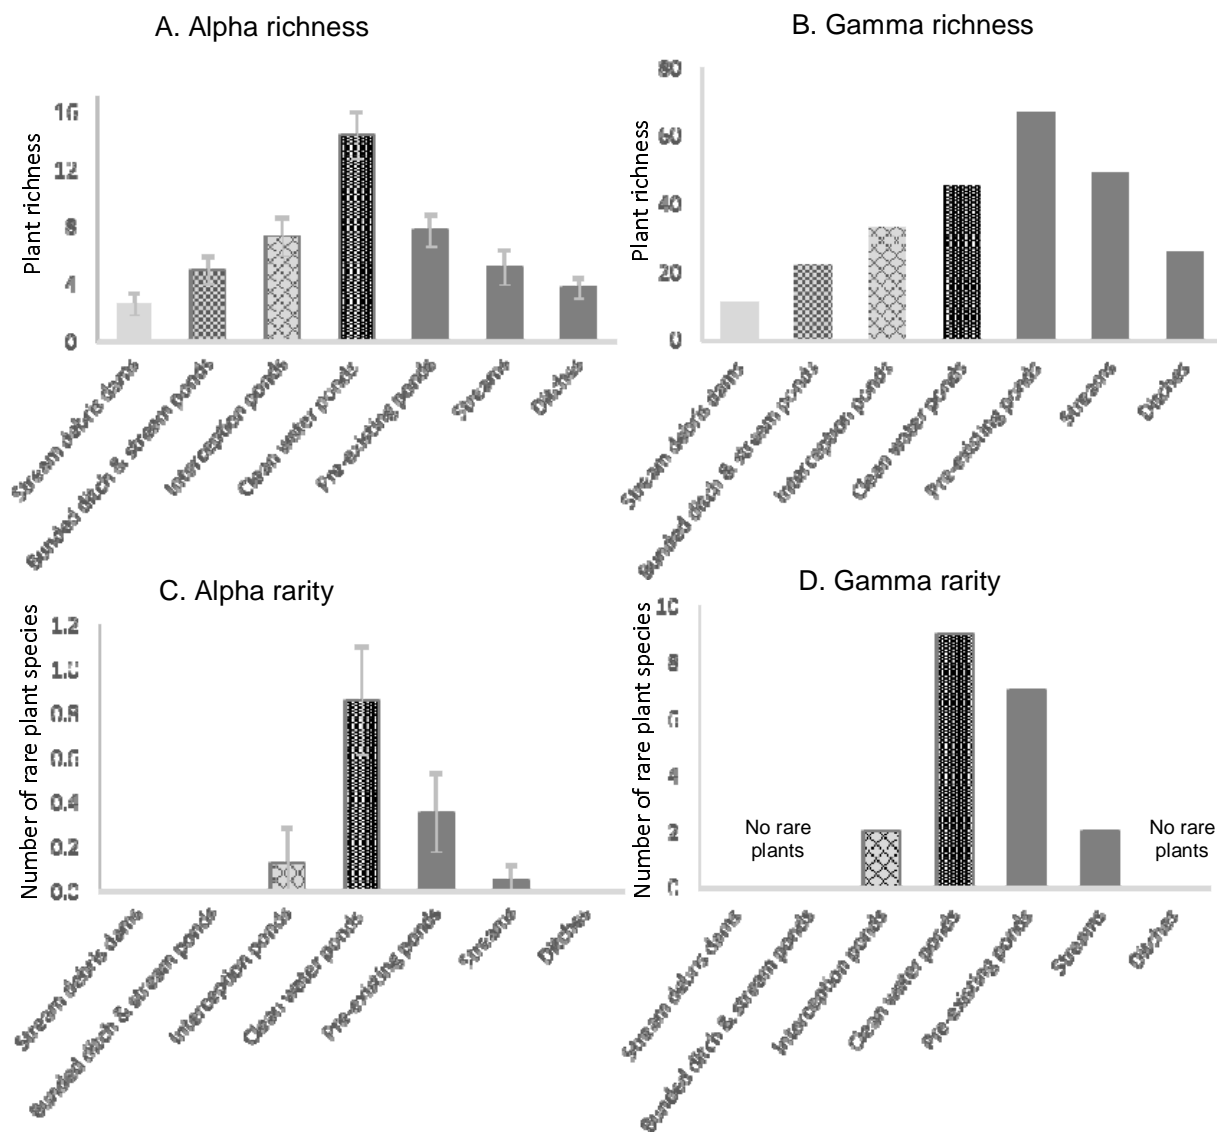

Figure 4. Alpha and gamma richness and rarity of measures ponds and other waterbody types in the Eye and Stonton catchments in 2018, when the measures were five years old. Error bars for alpha richness and rarity show 95% CLs.

### Eye Catchment: only ecosystem services measures added

A. Effect of adding ecosystem services measures on richness

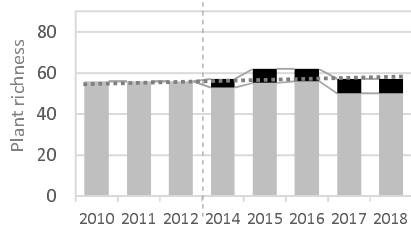

### Stonton Catchment: ecosystem services and biodiversity measures added

B. Effect of adding ecosystem services measures on richness

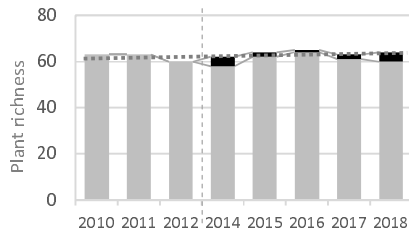

C. Effect of adding clean water ponds on richness

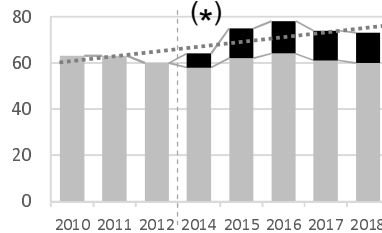

D. Effect of adding all nature based measures (B+C)

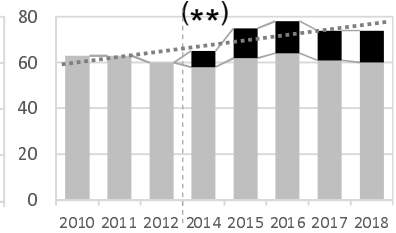

■ Plant species in all pre-existing waterbodies (streams, ditches, ponds)

■ Plant species added by the new measures

Figure 5. Change in gamma richness as a result of adding nature based measures to the experimental catchments. Ecosystem-services measures were added to the Eye Catchment. The Stonton Catchment received both ecosystem-services measures and clean water ponds. Dashed vertical lines separate the pre- and post-measure phases. Dotted lines show the simple linear regression for total plant richness. Asterisks denote the statistical significance of the regression equation: p-value <0.05 (\*\*), < 0.01 (\*\*), < 0.001 (\*\*\*)).

### Eye Catchment: only ecosystem services measures added

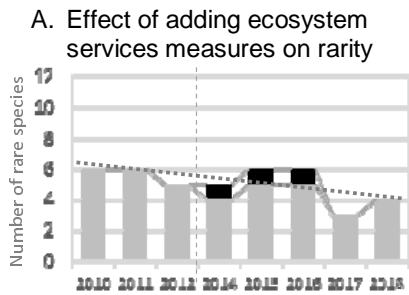

### Stonton Catchment: ecosystem services and biodiversity measures added

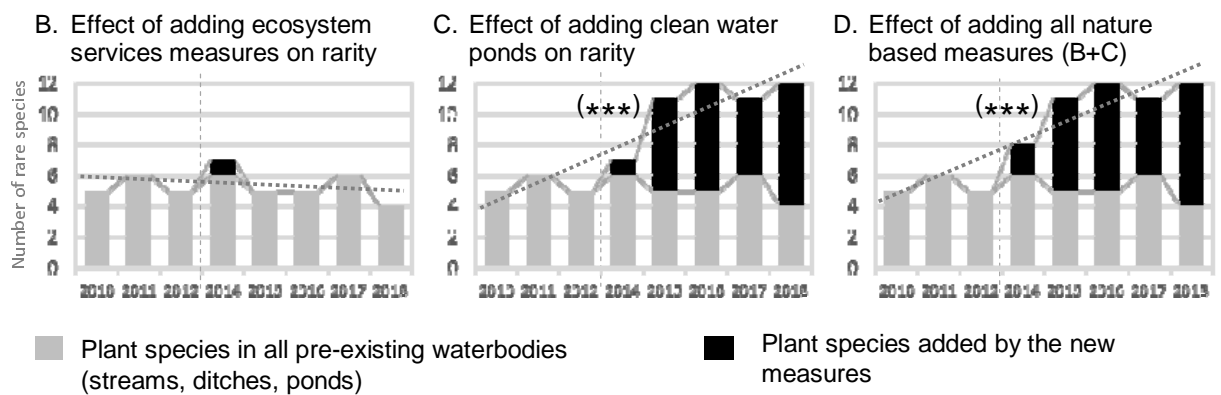

Figure 6. Change in gamma rarity as a result of adding nature based measures to the experimental catchments. Ecosystem-services measures were added to the Eye Catchment. The Stonton Catchment received both ecosystem-services measures and clean water ponds. Dashed vertical lines separate the pre- and post-measure phases. Dotted lines show the simple linear regression for total plant rarity. Asterisks denote the statistical significance of the regression equation: p-value <0.05 (\*\*), < 0.01 (\*\*), < 0.001 (\*\*\*)).
